# Supplementary material for: Identifying factors associated with overweight and obesity among intermediate school students aged 12–15 years in school settings: mixed-methodology protocol
Source: PubMed Central journal article supplement — BMJ Open. 2021 May 28;11(5):e045877. doi: 10.1136/bmjopen-2020-045877 (PMC8166636; doi:10.1136/bmjopen-2020-045877), 2021-05-28
Supplement: bmjopen-2020-045877.draft_revisions.pdf [file bmjopen-2020-045877.draft_revisions.pdf]

# BMJ Open

BMJ Open is committed to open peer review. As part of this commitment we make the peer review history of every article we publish publicly available.

When an article is published we post the peer reviewers' comments and the authors' responses online. We also post the versions of the paper that were used during peer review. These are the versions that the peer review comments apply to.

The versions of the paper that follow are the versions that were submitted during the peer review process. They are not the versions of record or the final published versions. They should not be cited or distributed as the published version of this manuscript.

BMJ Open is an open access journal and the full, final, typeset and author-corrected version of record of the manuscript is available on our site with no access controls, subscription charges or pay-per-view fees (<http://bmjopen.bmj.com>).

If you have any questions on BMJ Open's open peer review process please email [info.bmjopen@bmj.com](mailto:info.bmjopen@bmj.com)

# BMJ Open

## Identifying Factors Associated with Overweight and Obesity among Intermediate School Students Aged 12-15 Years in School Settings: Mixed Methodology Protocol

|                               |                                                                                                                                                                                                                                                                   |
|-------------------------------|-------------------------------------------------------------------------------------------------------------------------------------------------------------------------------------------------------------------------------------------------------------------|
| Journal:                      | <i>BMJ Open</i>                                                                                                                                                                                                                                                   |
| Manuscript ID                 | bmjopen-2020-045877                                                                                                                                                                                                                                               |
| Article Type:                 | Protocol                                                                                                                                                                                                                                                          |
| Date Submitted by the Author: | 16-Oct-2020                                                                                                                                                                                                                                                       |
| Complete List of Authors:     | Almutairi, Naif; Curtin University Bentley Campus, School of Public Health<br>Burns, Sharyn; Curtin University, Western Australian Centre for Health Promotion Research, School of Public Health<br>Portsmouth, Linda; Curtin University, School of Public Health |
| Keywords:                     | PUBLIC HEALTH, Public health < INFECTIOUS DISEASES, NUTRITION & DIETETICS                                                                                                                                                                                         |
|                               |                                                                                                                                                                                                                                                                   |

SCHOLARONE™  
Manuscripts

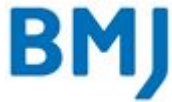

I, the Submitting Author has the right to grant and does grant on behalf of all authors of the Work (as defined in the below author licence), an exclusive licence and/or a non-exclusive licence for contributions from authors who are: i) UK Crown employees; ii) where BMJ has agreed a CC-BY licence shall apply, and/or iii) in accordance with the terms applicable for US Federal Government officers or employees acting as part of their official duties; on a worldwide, perpetual, irrevocable, royalty-free basis to BMJ Publishing Group Ltd ("BMJ") its licensees and where the relevant Journal is co-owned by BMJ to the co-owners of the Journal, to publish the Work in this journal and any other BMJ products and to exploit all rights, as set out in our [licence](#).

The Submitting Author accepts and understands that any supply made under these terms is made by BMJ to the Submitting Author unless you are acting as an employee on behalf of your employer or a postgraduate student of an affiliated institution which is paying any applicable article publishing charge ("APC") for Open Access articles. Where the Submitting Author wishes to make the Work available on an Open Access basis (and intends to pay the relevant APC), the terms of reuse of such Open Access shall be governed by a Creative Commons licence – details of these licences and which [Creative Commons](#) licence will apply to this Work are set out in our licence referred to above.

Other than as permitted in any relevant BMJ Author's Self Archiving Policies, I confirm this Work has not been accepted for publication elsewhere, is not being considered for publication elsewhere and does not duplicate material already published. I confirm all authors consent to publication of this Work and authorise the granting of this licence.

1  
2  
3  
4 **Identifying Factors Associated with Overweight and Obesity among Intermediate School**  
5 **Students Aged 12-15 Years in School Settings: Mixed Methodology Protocol**  
6

7 Naif Almutairi<sup>1</sup>, Sharyn Burns<sup>1</sup>, Linda Portsmouth<sup>1</sup>  
8  
9

10 <sup>1</sup>School of Public Health, Bentley Campus, Curtin University, Australia  
11  
12  
13

14  
15 Correspondence\*:  
16

17 Naif Almutairi<sup>1</sup>  
18 School of Population Health,  
19 Curtin University  
20 postal address: 1308/ 63 Adelaide Terrace,  
21 East Perth, WA 6004,  
22 Australia  
23 E-mail: naif.almutairi@postgrad.curtin.edu.au  
24 Phone: +61478166449  
25  
26  
27

28 **Key words: Obesity, Children, Adolescents, Mixed-methodology, Kingdom of Saudi**  
29 **Arabia**  
30  
31  
32  
33  
34  
35

36 **Word count: 3987**  
37  
38  
39  
40  
41  
42  
43  
44  
45  
46  
47  
48  
49  
50  
51  
52  
53  
54  
55  
56  
57  
58  
59  
60

## Abstract

### Introduction

Childhood obesity is a public health concern globally. In Arab countries, the prevalence of overweight and obesity has increased significantly over the last three decades. The level of childhood overweight and obesity in the Kingdom of Saudi Arabia (KSA) is high and continues to increase. This study will explore factors associated with overweight and obesity among adolescents and identify barriers and enablers to the implementation of comprehensive school-based obesity prevention interventions.

### Methods and Analysis

Socio-ecological Model will inform this mixed-methods study. The study will include three phases: (1) a scoping review of the literature; (2) the development of a student survey instrument; and (3) a mixed-method study comprising a cross-sectional survey targeting students aged 12-15 years with the collection of the students' height and weight measurements; one-on-one interviews with physical education teachers and school principals; and the administration of school climate audits using the Health Promoting School (HPS) framework. Reliability and validity of the survey instrument will be examined during survey development. Descriptive, inferential and thematic analysis will be employed using appropriate statistical software.

### Ethics and Dissemination

Ethical approval has been granted from the Curtin University of Human Research Ethics Committee (HR2020-0337). Permission to conduct the study has been granted from the KSA Ministry of Education. School principals will provide permission to conduct the study in individual schools. Individual consent/assent will be obtained from students and their parents, and teachers. Study findings will be disseminated via peer-review publications, reports and conferences.

### Strengths and limitations of this study

- The study will employ multiple methodologies to explore barriers and enablers within a school context to inform the development of interventions to reduce the prevalence of overweight and obesity among adolescents.
- An instrument will be developed and tested for reliability and validity with adolescents and validity with experts.

- A review of the published literature has indicated that this will be the first study to use Audit tools to assess the KSA school environment using the Health Promoting School (HPS) framework as a planning and evaluation tool and as a result, will inform the development of school-based interventions and policy focusing on reducing the prevalence of obesity.
- Participants will be recruited from intermediate level students from multiple schools; however, the study will be conducted only in one region of KSA, Jeddah.

For peer review only

## Introduction

Obesity in general, and childhood obesity specifically, is a key public health issue in many high-income countries (HIC) and is a steadily rising public health problem in low- and middle-income countries (LMIC). Globally, the overall overweight and obesity prevalence has nearly tripled since the mid-1970s and it is the fifth most common cause of mortality globally, contributing to at least 2.8 million deaths per year (1,2). Obesity among children and adolescents is associated with a range of psychological health issues including depression (3,4), low self-esteem (5) and increased risk of infections (6). Childhood obesity is also a risk factor for several non-communicable chronic diseases in adulthood (7) such as diabetes (8), hypertension (9), musculoskeletal disorders (10) and heart disease (11). It also impacts academic outcomes of school students, overall quality of life (12) and has been linked to psychosocial factors such as weight-based teasing (13). Obesity is also responsible for deaths in later life as a complication of chronic diseases (14,15). There is a substantial direct and indirect economic burden attributed to childhood overweight and obesity (16). Studies have reported costs attributable to overweight and obesity are three times higher for men and nearly five times higher for women with a history of childhood obesity (17,18).

During the past three decades, the prevalence of overweight and obesity in Arabic speaking countries has steadily increased (19). A study among adults involving 52 countries found the Middle East region to score the highest mean body mass index after North America (20). The increasing prevalence of overweight and obesity among children and adolescents in Eastern Mediterranean countries has reached a critical level where the prevalence of overweight and obese adolescents is greater than adolescents classified as normal weight (21). In a review conducted among children under 12 years in the Gulf countries, there was a 5%-14% and 3%-18% prevalence of obesity among males and females respectively (22).

Similarly, the level of childhood overweight and obesity in the Kingdom of Saudi Arabia (KSA) is high and continues to increase (23,24). A study in 2012 in KSA among 19,317 children and adolescents (aged 5-18 years) found the prevalence of overweight, obesity and severe obesity to be 23%, 9% and 2%, respectively (25). Another recent study in 2015 in KSA among 7930 children aged 6-16 years reported 13% to be overweight and 18% to be obese (26). In recent decades, the population of KSA has undergone a nutritional transition where traditional food is being substituted by fast food which is usually energy-dense and nutrient-poor (27). The consumption of unhealthy foods and sugary carbonated drinks, especially

1  
2  
3 among children and adolescents is increasing at a rapid rate (28). In addition, Saudi people are  
4 more likely to adopt sedentary lifestyles when compared to other non-Arab cultures (29). The  
5 increased socio-economic status of KSA residents has also resulted in increased use of personal  
6 cars for transportation and an increase in indoor games and television viewing which has  
7 resulted in children and adolescents being less likely to walk to school and play outdoors than  
8 in the past (30).  
9

10  
11  
12  
13  
14 Considering the increased prevalence along with the health and economic issues associated  
15 with childhood obesity, effective programs to encourage physical activity and improve healthy  
16 eating behaviours to prevent obesity are imperative (31). Schools have been identified as an  
17 ideal setting to promote health given the association between health and education along with  
18 the amount of time children and adolescents spend at school (32).  
19

20  
21  
22  
23  
24 The Health-Promoting Schools (HPS) Framework is adopted by the World Health  
25 Organization and recommends a whole of school approach to promote healthy schools.  
26 (33,34). The HPS Framework focuses on the domains of Curriculum, Teaching and Learning;  
27 School Organisation, Ethos and Environment; and Partnerships and Services.  
28  
29

30  
31  
32  
33  
34  
35  
36  
37  
38  
39  
40  
41  
42  
43  
44  
45  
46  
47  
48  
49  
50  
51  
52  
53  
54  
55  
56  
57  
58  
59  
60  
Published research in KSA has primarily focused on a single element in regards to the  
determinants of weight-related issues among adolescents including anthropometric  
measurement (35); dietary patterns such as eating in restaurants; and sedentary lifestyles with  
low levels of physical activity (23,36). There is no published research that focuses on broader  
socio-ecological influences of overweight and obesity among Saudi children and adolescents  
within the school setting (37). This study aims to address this gap by adopting a mixed methods  
approach to explore factors associated with overweight and obesity among Intermediate School  
students aged 12-15 years within the school setting in Jeddah, KSA

## Methods

### Objectives

The specific objectives of the study are: a) to identify self-reported physical activity and  
nutrition knowledge, attitudes, and behaviours; b) to determine the association between BMI,  
sociodemographic factors, and nutrition and physical activity related knowledge, attitudes, and  
behaviours; and c) to explore barriers and enablers to the implementation of comprehensive  
school-based obesity prevention interventions perceived by schoolteachers and school



1  
2  
3 principals; and d) undertake school audits to determine factors within the schools that may  
4 influence overweight and obesity.  
5  
6

### 7 **Research design**

8  
9  
10 This mixed methods study will be informed by the Social-Ecological Model (SEM) (38)  
11 which has been used in the context of obesity elsewhere (39,40). The Health Promoting  
12 Schools (HPS) Framework will also inform the study design (41). This study will be conducted  
13 in three phases: (1) a scoping review of the literature; (2) the development of a student survey  
14 instrument; and (3) a mixed methods study comprising a cross-sectional survey of students  
15 aged 12-15 years investigating their knowledge, attitudes, and behaviours with regard to  
16 physical activity and nutrition; the collection of student BMI measurements; one-on-one  
17 interviews with physical education teachers and school principals; and school climate audits.  
18  
19  
20  
21  
22  
23

### 24 **Theoretical framework**

25  
26  
27 Major tenets of the SEM acknowledge and situate adolescents within their environment and  
28 further recognize the position of ecology or contextual elements for children within their family  
29 and wider social context (42). The theory posits that the health and health behaviours of  
30 individuals are interconnected with their surroundings, and that environment needs to be  
31 understood in order to explain health (40,42,43). In essence, the socio-ecological perspective  
32 considers a more comprehensive view of the influences on childhood and adolescent  
33 overweight and obesity (44). The SEM recognizes influences at the student, interpersonal  
34 (family, peers and teachers), school environment, community and policy levels (45). The  
35 factors associated with childhood overweight and obesity are multifactorial and interconnected,  
36 hence the social-ecological framework (SEM) will be used to inform this study. Figure 1  
37 describes the interrelationship between the SEM and the study design.  
38  
39  
40  
41  
42  
43  
44  
45

### 46 **Setting**

47  
48  
49 The study will be conducted in Jeddah City, KSA in three boys' and three girls' Intermediate  
50 Schools. Schools will be randomly selected from 262 Intermediate Government Schools,  
51 recruiting approximately even numbers of males and females. Students (Grades 7 to 9; 12 – 15  
52 years), teachers and principals will be invited to participate in the study. In KSA, all schools  
53 are single gender (46).  
54  
55  
56  
57  
58  
59  
60

## **Phase One: Scoping Review**

A scoping review will be initially conducted to understand school-based obesity prevention interventions in Arabic speaking countries. PICO format (47) will be used to guide the development of the review's question, generating relevant keywords for searching and developing inclusion and exclusion criteria. This review will consider school-based interventions focusing on overweight and obesity prevention (including promotion of healthy eating and physical activity) within schools in predominantly Arabic speaking countries (n=22 countries) within the last 10 years. Finally, a systematic search and screening will be conducted and reported according to the PRISMA flowchart (48).

### ***Search Strategy and Study Selection***

Systematic searches of the following electronic databases will be undertaken through PubMed, Medline, Scopus, CINHAL, Cochrane, ERIC, EMBASE, ProQuest, EBSCO Host and Global Health and manual exploration of relevant publications will be conducted. School-based intervention studies will be included with keywords (Child or Adol\*) and (Bahrain or Kuwait or Oman or Qatar or Saudi Arabia or United Arab Emirates or gulf countries or Gulf Cooperation Council or Algeria or Palestinian Territories or Comoros or Djibouti or Egypt or Iraq or Jordan or Lebanon or Libya or Mauritania or Morocco or Somalia or Sudan or Syria or Tunisia or Yemen) and school and (intervention or program or curriculum or health promotion or health education) and (physical activity or exercise or diet or nutrition or food choices or obesity or overweight or BMI or Body Mass Index or body weight). Inclusion criteria will be studies which focus on school-aged children from five to 18 years, interventions aiming to prevent overweight and obesity, school-based quantitative and/or qualitative intervention studies, peer-reviewed articles published in English or Arabic and articles for which full text is available. Systematic searching will be documented, and duplicates will be removed using reference management software (i.e. EndNote X9). The relevant data extracted from each article will be systematically summarized and tabulated and will be analysed for intervention characteristics, measurable outcomes, and the enablers and barriers of the interventional studies (34).

### **Phase Two: Survey Development:**

A self-report survey will be developed to measure demographics and knowledge, attitudes, and behaviours (KAB) regarding physical activity and nutrition among Grade 7 to 9 students

(Figure 2). The survey will be informed by the literature and where possible previously validated items will be used. The survey be tested for validity and reliability (49). Content validity testing of the survey will be conducted with experts (i.e. public health academics with clinical and education backgrounds from KSA; n = 6-8) initially in English and the final format in Arabic. The survey will be tested for reliability. A test-retest will be conducted in Jeddah KSA with seventh grade (aged 12) students (male, n= 60 and female= 60) from two schools (one male and one female) not involved in the main study. The survey will be administered by a research assistant in a classroom at a time convenient to the school in paper or online. The survey will be administered to the same 60 students two weeks after the initial survey administration. This pilot study will inform the researchers, the minimum and maximum time required to complete the survey.

### ***Instrumentation***

Demographics including age, gender, grade level and parent education level will be collected. Physical activity knowledge will be measured using five questions adapted from a Malaysian study involving 8-11 year old children (responses “True”, “False” and “I don’t know”) (50). Attitudes toward physical activity will be measured using an eight question scale adapted from a university study in Gambia (Likert scale: strongly agree (1) to strongly disagree (5) (51). Physical activity behaviours will be measured using eight questions. The first question uses the SCREENS questionnaire which was originally developed for children aged 6 to 10 years in Denmark (SCREENS-Q). This question includes six-sub questions and focuses on time per day spent on different screen-related activities (52). The remaining five questions were adapted to the KSA intermediate school context from the Australian National Nutrition and Physical Activity Survey which collected data about 5-17-year olds. These questions focus on usual daily activity, level of activity and amount and type of sports activities provided at school (53). Nutrition knowledge will be measured using eight items adapted from a validated nutritional survey developed for use among urban South African adolescents (responses: true, false, I don’t know) (54,55). Eight 8 items adapted from an English survey for 11-12 year olds will measure nutrition attitudes (Likert scale: strongly agree (1) to strongly disagree (5) (55). Nutrition-related behaviours will be measured using nine questions adapted from an Australian school students survey. These questions focus on types and approximate quantities of food consumed

1  
2  
3 on a usual day. Questions focus of fruit, vegetable, bread and cereal, fast food, energy dense  
4 snacks, sugary drinks, milk and water consumption (56).  
5  
6

### 7 **Phase Three: Mixed Methods Study**

8  
9

10 Phase three will comprise the mixed methods study which includes a cross-sectional survey  
11 and BMI measurements with Grade 7 to 9 students. Individual interviews with physical  
12 education teachers and school principals and the administration of school environment audits  
13 will also be undertaken (Figure 2).  
14  
15

#### 16 *Study population and sample size*

17

##### 18 *(a) Cross-sectional and BMI measurements*

19  
20  
21

22 Of the 262 Intermediate Schools in Jeddah, six schools will be randomly selected. A random  
23 sample of six Intermediate Schools will be generated from six different geographical regions  
24 in Jeddah using SPSS random generated sample selection method. Intermediate Schools  
25 include students from Grades 7 to 9. All students within participating classes from each school  
26 will be invited.  
27  
28  
29

30  
31  
32 Principals will provide consent for the school to participate in the study. Parental consent and  
33 student assent will be required for individual student participation. Inclusion criteria will be  
34 children from Grades 7 to 9 who assent to participate and for whom parental consent is  
35 provided. Students who are unable to take the survey for any reason and/or are unable to stand  
36 up long enough to have their height and weight measured (i.e. students who are not cognitively  
37 or physically able to participate) will be excluded from the study.  
38  
39  
40  
41

42  
43 In order to calculate sufficient sample size to ensure representativeness of the study population,  
44 the highest available prevalence of overweight and obesity (23.1%) reported among KSA  
45 children and adolescents in a study by El Mouzan et al., (25) was used. The following formula  
46 was used for sample size calculation: Sample size (n) =  $\frac{Z^2 \cdot \alpha/2 \cdot Pq}{d^2}$  (57). Based on the  
47 formula, the required minimum sample size for Intermediate School (12-15 years old), is 273  
48 participants. To factor in 10% non-response rate, a total of 300 students is required for this  
49 study. Since this study employed cluster sampling a design effect will be employed. A design  
50 effect usually ranges from 1 to 3 (58). Therefore, the design effect of two will be used to reach  
51 a sample size of 600. Since this study is targeting both male and female students, the total  
52 estimated sample size will be 1200 students (600 males and 600 females).  
53  
54  
55  
56  
57  
58  
59  
60

1  
2  
3 ***(b) Interview with school principals and sport teachers***  
4  
5

6 We will aim to recruit six physical education teachers and six principals or deputy principals  
7 (one teacher and one principal/deputy from each school; n= 12). Due to cultural reasons, the  
8 male principal researcher will conduct face to face interviews with male participants and phone  
9 interviews with the female participants.  
10  
11  
12

13 ***(c) School Climate Audit***  
14  
15

16 The principal researcher (or the research assistant for female schools) will complete the school  
17 audit checklist with the school principal or deputy and one physical education teacher.  
18  
19

20 **Data Collection**  
21

22 ***(a) Cross-sectional and BMI measurements***  
23  
24

25 The validated self-administrated survey (developed in Phase 2) will collect demographic  
26 information and physical activity and nutrition knowledge, attitudes and behaviours. The self-  
27 report instrument will be administered via paper or online during class time by the principal  
28 researcher (or research assistant in the girls' schools) with the assistance of the classroom  
29 teachers in each school.  
30  
31  
32

33  
34 The height and weight of consenting students will also be measured. The researcher will follow  
35 the international standards for anthropometric assessment (59). The BMI for age will be  
36 calculated (59). The principal investigator will take the measurements of the male students and  
37 female research assistant will be employed to measure female students and both will be trained  
38 in correct anthropometric measurement techniques. A calibrated digital measuring scale will  
39 be used, and the scale will be reset before measurement. The use of such digital scales has been  
40 supported for good accuracy with evidence (60). Student height will be measured using a  
41 portable stadiometer set up on a hard, flat surface (61). Privacy will be given to each child so  
42 that their measurements are known only to the person taking the measurements. The height and  
43 weight data measurement will be written on the individual survey forms.  
44  
45  
46  
47  
48  
49  
50  
51

52 ***(b) Interview with school principals and sport teachers***  
53  
54

55 Individual in-depth interviews will be conducted with physical education teachers and  
56 principals to explore their beliefs and perceptions of the barriers and enablers to the  
57  
58  
59  
60

1  
2  
3 implementation of school-based interventions focusing on obesity prevention. This is expected  
4 to provide a richer understanding of the topic from the point of view of relevant school staff.  
5  
6

7  
8 The questions will be informed by the results of the systematic review, the cross-sectional study  
9 and relevant literature (62–67), and a semi-structured interview guide will be developed. The  
10 interview guide will be piloted with two teachers uninvolved in the study to estimate the time  
11 the interview can be expected to take and to obtain feedback on the clarity of the interview  
12 questions.  
13  
14  
15

16  
17 The semi-structured one-on-one interviews will be audiotaped, transcribed verbatim,  
18 translated and will be reviewed by the researcher and supervisors to maintain dependability  
19 and determine credibility (68). The translation process will resume after transcription with an  
20 audio converter Arabic to Arabic then the researcher will review all the resulting transcriptions  
21 and adjust for accuracy. The principal investigator will translate for the closest intended  
22 meaning based on his knowledge of English and Arabic then will get this checked by an  
23 Accredited English-Arabic translator.  
24  
25  
26  
27  
28  
29

### 30 ***(c) School Climate Audit***

31 A school climate audit tool will be developed from previous tools based on the Health  
32 Promoting Schools (HPS) Framework (33,69) and will be based on the three interrelated  
33 components of the HPS Framework: curriculum, teaching and learning; school organisation,  
34 ethos and environment; and partnerships and services. (70–72). The tool will be adapted from  
35 the items from four studies with acceptable psychometric levels: a tool developed for multiple  
36 countries with almost perfect reliability ( $\kappa=0.80-0.96$ ) (70); an audit tool focusing on the  
37 walkability of school environments with average interrater reliability score from US ( $\kappa=0.839$ )  
38 (73); school audit tools used in the IDEA study in the US (74); and the Australian HPS school  
39 audit (72). The tool includes whole school strategies relevant to promoting good nutrition and  
40 physical activity.  
41  
42  
43  
44  
45  
46  
47  
48

## 49 **Data Analysis**

### 50 **Phase Two: Survey Analysis:**

#### 51 ***Survey development (validity and reliability testing)***

52  
53 Validity and reliability during the survey development and the cross-sectional survey will be  
54 examined using different types of factor analysis as details are detailed below (Figure 2).  
55  
56  
57  
58  
59  
60

### ***Explanatory factor Analysis***

The initial construct validity of the instrument will be established through exploratory factor analysis (EFA), allowing the transformation of correlations among a set of observed variables into each of the six proposed subscales of overweight and obesity (75). EFA will be used to extract factors with eigenvalues  $> 1$ , which will then be rotated to identify subscales or factors that best fit the instrument (76) and decisions will be made if the items need to be excluded which is testing the initial construct validity of the instrument. The assumptions should be met where the number of participants is sufficient as literature states that three to 20 people per variable is sufficient to run this EFA analysis (77), the Kaiser-Mayer-Olkin (KMO) ( $>0.50$ ) and Bartlett's test of sphericity ( $P<0.05$ ). For the sample size of 120 students, the sufficient factor loading is above 0.50 (78).

### ***Internal consistency***

Once the factors are extracted using the EFA, internal consistency of each factor within the instrument and its items will be measured using Cronbach's alpha, an alpha greater than or equal to 0.7 will be considered adequate (79).

### ***Test-retest reliability***

The scores and mean scores obtained during the two surveys will be calculated with the Pearson product-moment correlation analysis. Spearman's rho, a measure of agreement between scores on different administrations of the instrument will be calculated and the correlation coefficient between 0.7 and 1.0 indicate that the instrument is reliable or shows consistency across time (80,81).

## **Phase Three: Mixed Methods Study**

### ***(a) Cross-sectional and BMI measurements***

#### ***Confirmatory factor analysis***

In this phase, the construct validity will be assessed using confirmatory factor analysis (CFA). For confirmatory content analysis and explanatory analysis more than 500 or 10 samples per item are sufficient (82). In our study, the sample size calculated is 1200 which is sufficient to undergo confirmatory factor analysis. This construct validity using CFA will indicate whether the subscales of overweight and obesity identified in phase two are valid and is achieved when the fitness indexes is achieved to the required level: Chi-square  $\chi^2$  ( $p\text{-value} > 0.05$ ), Chi-Square/

1  
2  
3 df < 3.0, Root Mean Square Error of Approximation (RMSEA) < 0.08), Goodness-of-Fit Index  
4 (GFI) > 0.90 comparative fit index (CFI) > 0.90 Normed Fit Index > 0.90 (83). The second  
5 stage of EFA analysis at this phase is to identify and estimate whether it fits the model and the  
6 degrees of freedom as well. The CFA will be analysed using a powerful structural equation  
7 modelling software IBM SPSS Amos. Finally, the model will be rearranged revised to improve  
8 the fit as indicated and Akaike Information Criterion (AIC) will be used to compare between  
9 model during the fitting process (84).

### 16 *Descriptive data analysis*

17  
18 During data entry, exploratory data analysis will be conducted to identify outliers, missing data,  
19 describe and check the assumption of normality and distribution of continuous data using  
20 histogram and Kolmogorov-Smirnov test and Shapiro-Wilk test (85). The central tendencies  
21 will be expressed in mean, median, standard deviations and interquartile range for continuous  
22 data while frequencies and percentages will be used to express data for categorical variables.  
23 Chi-square tests ( $\chi^2$ ) will assess the associations between each independent variable and  
24 overweight and obesity.

### 31 *Inferential data analysis*

32  
33 Initially, all variables will be analysed univariately and those with p-value more than 0.25 will  
34 be included in the model to avoid the possibility of residual cofounders (57). Logistic  
35 regression will be employed to analyse the predictors of obesity and overweight (BMI  
36 measurements). The significance level will be set at  $P < 0.05$  at 95% confidence interval (CI).  
37 Data analysis will be carried out using the Statistical Package for Social Sciences (SPSS)  
38 software version 26.0.

### 45 **(b) Interview with school principals and sport teachers**

46  
47 Content analysis will explore perceptions and experiences, generating rich and in-depth  
48 information on the underlying studied phenomena (86). Themes will be identified, and  
49 responses coded to elicit shared meanings of perceptions across interviews and to guide the  
50 researchers in reporting the results. For this purpose, directed thematic analysis approach will  
51 be employed (87). Common themes and subthemes will be identified based on the interview  
52 responses (88). The qualitative data will be managed using software package NVivo 12. When  
53  
54  
55  
56  
57  
58  
59  
60



1  
2  
3 the interview is transcribed, it will be sent back to a sample of consenting participants for  
4 verification.  
5

### 6 7 **(c) School Climate Audit** 8

9  
10 The school climate audit will be reviewed by health promotion and education experts from  
11 Australia and KSA to determine face and content validity. The tool will be tested with two  
12 teachers from the two Intermediate Schools in Jeddah conducting the student survey test-retest.  
13 The audit responses will be classified as “implemented”, “partially implemented” and “not  
14 implemented” and will be tabulated and evaluated section by section.  
15  
16  
17  
18

### 19 **Patient and public involvement** 20

21 No patient or public involved.  
22

### 23 **Ethics and dissemination** 24

25  
26 Ethical approval has been granted through Curtin University’s Human Research Ethics  
27 Committee (HRE2020-0337) and permission granted from the General Directorate of  
28 Education in Jeddah. Initially consent will be obtained from the principals of each school  
29 involved to allow their school to participate in the study. Individual consent will be sought  
30 from teachers, principal/deputy and parents and assent sought from students. Participant  
31 information sheets will be provided for the principal describing the school’s involvement. All  
32 participants (teachers, principals/deputies, students) and parents will be provided individual  
33 participant information sheets describing the study and highlighting the voluntary nature of the  
34 study.  
35  
36  
37  
38  
39  
40  
41

42 All information collected from participating schools, principals, teachers and students will be  
43 de-identified. Students completing the survey will be assigned an identification (ID)  
44 number/code stipulated in the survey prior to data collection so that their BMI can be linked to  
45 their survey responses. If surveys are conducted on paper they will be scanned, and originals  
46 stored securely until appropriately disposed. All electronic data will be stored on a secure  
47 password protected network which can only be accessed by the researchers. Data will be  
48 appropriately disposed of after a minimum of seven years after project completion or until the  
49 participant has reached 25 years of age (89). Results will be presented as aggregate and there  
50 will be no identification of individuals.  
51  
52  
53  
54  
55  
56  
57  
58  
59  
60

To facilitate knowledge, transfer the study findings will be disseminated in a number of ways. Findings will be published as a doctoral thesis, in peer review publications and at conferences. In addition, key findings will be shared with the KSA Ministry of Education, participating schools and to the broader school community through newsletters.

**Contributors** All authors contributed significantly to the conceptualisation, design and drafting of this protocol. NA, conceived the study which was developed with guidance and support from SB and LP. NA drafted the paper which was critically reviewed and edited by SB and LP. All authors approved the final version of the manuscript.

**Funding statement** This research project is funded by Royal Embassy of Saudi Arabia in Australia (Award/Grant number is not applicable) and administered through the doctoral programme run at Curtin University's School of Public Health.

**Competing interests** none declared

**Ethics approval** Ethics approval has been obtained from Curtin University (**HRE2020-0337**), and from the General Directorate of Education in Jeddah.

**Patient consent for publication** Not required.

**Provenance and peer review** Not commissioned; externally peer reviewed.

**Open access** This is an open access article distributed in accordance with the Creative Commons Attribution Non Commercial (CC BY-NC4.0) license, which permits others to distribute, remix, adapt, build upon this work non-commercially, and license their derivative works on different terms, provided the original work is properly cited, appropriate credit is given, any changes made indicated, and the use is non-commercial. See: <http://creativecommons.org/licenses/by-nc/4.0/>.

#### **ORCID iDs**

Naif Almutairi [0000-0002-7330-7244](https://orcid.org/0000-0002-7330-7244)

Sharyn Burns [0000-0002-1551-2805](https://orcid.org/0000-0002-1551-2805)

Linda Portsmouth [0000-0002-9803-8546](https://orcid.org/0000-0002-9803-8546)

## Reference

1. WHO. Global Health Observatory (GHO) data- Overweight and obesity -Prevalence of obesity among children and adolescents [Internet]. 2018 [cited 2019 Dec 11]. Available from: [https://www.who.int/gho/ncd/risk\\_factors/overweight\\_obesity/obesity\\_adolescents/en/](https://www.who.int/gho/ncd/risk_factors/overweight_obesity/obesity_adolescents/en/)
2. Bentham J, Di Cesare M, Bilano V, Bixby H, Zhou B, Stevens GA, et al. Worldwide trends in body-mass index, underweight, overweight, and obesity from 1975 to 2016: a pooled analysis of 2416 population-based measurement studies in 128·9 million children, adolescents, and adults. *Lancet*. 2017 Dec 16;390(10113):2627–42.
3. Sutaria S, Devakumar D, Yasuda SS, Das S, Saxena S. Is obesity associated with depression in children? Systematic review and meta-analysis. *Arch Dis Child*. 2019 Jan 1;104(1):64–74.
4. Nemiary D, Shim R, Mattox G, Holden K. The relationship between obesity and depression among adolescents. *Psychiatr Ann*. 2012;42(8):305–8.
5. Danielsen YS, Stormark KM, Nordhus IH, Mæhle M, Sand L, Ekornås B, et al. Factors associated with low self-esteem in children with overweight. *Obes Facts*. 2012 Nov;5(5):722–33.
6. Bechard LJ, Rothpletz-Puglia P, Touger-Decker R, Duggan C, Mehta NM. Influence of obesity on clinical outcomes in hospitalized children. Vol. 167, *JAMA Pediatrics*. 2013. p. 476–82.
7. WHO. Obesity: Preventing and managing the global epidemic. World Health Organization: Technical Report Series [Internet]. WHO Technical Report Series, no. 894. 2000 [cited 2019 Dec 11]. p. 252. Available from: [https://www.who.int/nutrition/publications/obesity/WHO\\_TRS\\_894/en/](https://www.who.int/nutrition/publications/obesity/WHO_TRS_894/en/)
8. Fang X, Zuo J, Zhou J, Cai J, Chen C, Xiang E, et al. Childhood obesity leads to adult type 2 diabetes and coronary artery diseases. *Medicine (Baltimore)* [Internet]. 2019 Aug [cited 2019 Dec 11];98(32):e16825. Available from: <http://insights.ovid.com/crossref?an=00005792-201908090-00076>
9. Brady TM. Obesity-related hypertension in children. Vol. 5, *Frontiers in Pediatrics*. Frontiers Media S.A.; 2017.

- 1  
2  
3  
4  
5  
6  
7  
8  
9  
10  
11  
12  
13  
14  
15  
16  
17  
18  
19  
20  
21  
22  
23  
24  
25  
26  
27  
28  
29  
30  
31  
32  
33  
34  
35  
36  
37  
38  
39  
40  
41  
42  
43  
44  
45  
46  
47  
48  
49  
50  
51  
52  
53  
54  
55  
56  
57  
58  
59  
60
10. Onyemaechi NOC, Anyanwu GE, Obikili EN, Onwuasoigwe O, Nwankwo OE. Impact of overweight and obesity on the musculoskeletal system using lumbosacral angles. *Patient Prefer Adherence* [Internet]. 2016 Mar 10 [cited 2020 Aug 18];10:291–6. Available from: [/pmc/articles/PMC4792212/?report=abstract](#)
11. Carbone S, Canada JM, Billingsley HE, Siddiqui MS, Elagizi A, Lavie CJ. Obesity paradox in cardiovascular disease: Where do we stand? [Internet]. Vol. 15, *Vascular Health and Risk Management*. Dove Medical Press Ltd.; 2019 [cited 2020 Aug 18]. p. 89–100. Available from: [/pmc/articles/PMC6503652/?report=abstract](#)
12. Buttitta M, Iliescu C, Rousseau A, Guerrien A. Quality of life in overweight and obese children and adolescents: a literature review. Vol. 23, *Quality of life research: an international journal of quality of life aspects of treatment, care and rehabilitation*. 2014. p. 1117–39.
13. Krukowski RA, Smith West D, Philyaw Perez A, Bursac Z, Phillips MM, Raczynski JM. Overweight children, weight-based teasing and academic performance. *Int J Pediatr Obes*. 2009;4(4):274–80.
14. Gunnell DJ, Frankel SJ, Nanchahal K, Peters TJ, Davey Smith G. Childhood obesity and adult cardiovascular mortality: a 57-y follow-up study based on the Boyd Orr cohort. *Am J Clin Nutr* [Internet]. 1998 Jun 1 [cited 2019 Dec 11];67(6):1111–8. Available from: <https://academic.oup.com/ajcn/article/67/6/1111-1118/4666016>
15. Franks PW, Hanson RL, Knowler WC, Sievers ML, Bennett PH, Looker HC. Childhood Obesity, Other Cardiovascular Risk Factors, and Premature Death. *N Engl J Med* [Internet]. 2010 Feb 11 [cited 2019 Dec 11];362(6):485–93. Available from: <http://www.nejm.org/doi/abs/10.1056/NEJMoa0904130>
16. Sonntag D. Why Early Prevention of Childhood Obesity Is More Than a Medical Concern: A Health Economic Approach. *Ann Nutr Metab* [Internet]. 2017 [cited 2019 Dec 11];70(3):175–8. Available from: <https://www.karger.com/Article/FullText/456554>
17. Sonntag D, Ali S, De Bock F. Lifetime indirect cost of childhood overweight and obesity: A decision analytic model. *Obesity*. 2016 Jan 1;24(1):200–6.
18. Sonntag D, Ali S, Lehnert T, Konnopka A, Riedel-Heller S, König HH. Estimating the

- lifetime cost of childhood obesity in Germany: Results of a Markov Model. *Pediatr Obes*. 2015 Dec 1;10(6):416–22.
19. Musaiger AO, Hassan AS, Obeid O. The paradox of nutrition-related diseases in the Arab countries: The need for action. Vol. 8, *International Journal of Environmental Research and Public Health*. 2011. p. 3637–71.
  20. Yusuf S, Hawken S, Ôunpuu S, Bautista L, Franzosi MG, Commerford P, et al. Obesity and the risk of myocardial infarction in 27 000 participants from 52 countries: A case-control study. *Lancet*. 2005 Nov 5;366(9497):1640–9.
  21. Musaiger AO, Al-Mannai M, Al-Lalla O, Saghir S, I.Halahleh, Benhamed MM, et al. Obesity among adolescents in five Arab countries; relative to gender and age. *Nutr Hosp*. 2013;28(6).
  22. Sultan ALNohair. Obesity in gulf countries. *Int J Health Sci (Qassim)* [Internet]. 2014;8(1):79–83. Available from: <http://www.pubmedcentral.nih.gov/articlerender.fcgi?artid=4039587&tool=pmcentrez&rendertype=abstract>
  23. Al-Muhaimeed AA, Dandash K, Ismail MS, Saquib N. Prevalence and correlates of overweight status among Saudi school children. *Ann Saudi Med*. 2015 Jul 1;35(4):275–81.
  24. Al-Ghamdi S, Shubair MM, Aldiab A, Al-Zahrani JM, Aldossari KK, Househ M, et al. Prevalence of overweight and obesity based on the body mass index; A cross-sectional study in Alkharj, Saudi Arabia. *Lipids Health Dis*. 2018 Jun 5;17(1).
  25. El Mouzan MI, Foster PJ, Al Herbish AS, Al Salloum AA, Al Omer AA, Qurachi MM, et al. Prevalence of overweight and obesity in Saudi children and adolescents. *Ann Saudi Med*. 2010;30(3):203–8.
  26. Al-Hussaini A, Bashir M, Khormi M, AlTuraiki M, Alkhamis W, Alrajhi M, et al. Overweight and obesity among Saudi children and adolescents: Where do we stand today? *Saudi J Gastroenterol* [Internet]. 2019 [cited 2019 Dec 11];25(4):229. Available from: <http://www.saudijgastro.com/text.asp?2019/25/4/229/259848>
  27. Moalla N, Al Moraie D. Dietary Patterns in Saudi Arabian Adults Residing in Different Geographical Locations in Saudi Arabia and in the UK in Relation to Heart Disease

- Risk. Newcastle University; 2014.
28. Aljoudi A, Mwanri L, Al Dhaifallah A. Childhood obesity in Saudi Arabia: Opportunities and challenges. *Saudi J Obes.* 2015;3(1):2.
  29. Musaiger AO. Overweight and Obesity in EasternMediterranean Region: Prevalence and Possible Causes. *J Obes.* 2011;2011(January 1990):1–17.
  30. Sahoo K, Sahoo B, Choudhury AK, Sofi NY, Kumar R, Bhadoria AS. Childhood obesity: Causes and consequences. *J Fam Med Prim care.* 2015;4(2):187–92.
  31. Musaiger AO, Al Hazzaa HM, Al-Qahtani A, Elati J, Ramadan J, AboulElla NA, et al. Strategy to combat obesity and to promote physical activity in Arab countries. *Diabetes, Metab Syndr Obes Targets Ther.* 2011;4:89–97.
  32. Chen Y, Ma L, Ma Y, Wang H, Luo J, Zhang X, et al. A national school-based health lifestyles interventions among Chinese children and adolescents against obesity: Rationale, design and methodology of a randomized controlled trial in China. *BMC Public Health.* 2015;15(1):1–10.
  33. Langford R, Bonell C, Jones H, Pouliou T, Murphy S, Waters E, et al. The World Health Organization’s Health Promoting Schools framework: A Cochrane systematic review and meta-analysis. *BMC Public Health.* 2015;15(1):1–15.
  34. Bennett L, Burns S. Implementing health-promoting schools to prevent obesity. *Health Educ [Internet].* 2020 [cited 2020 Jul 27];120(2). Available from: <https://www.emerald.com/insight/0965-4283.htm>
  35. Al-Hazzaa HM. Prevalence and trends in obesity among school boys in Central Saudi Arabia between 1988 and 2005. *Saudi Med J.* 2007;28(10):1569–74.
  36. Al-Hazzaa HM, Al-Sobayel HI, Abahussain NA, Qahwaji DM, Alahmadi MA, Musaiger AO. Association of dietary habits with levels of physical activity and screen time among adolescents living in Saudi Arabia. *J Hum Nutr Diet.* 2014;27(SUPPL2):204–13.
  37. Schoon M, Leeuw S Van Der. The shift toward social-ecological systems perspectives : insights into the human-nature relationship. *Natures Sci Sociétés.* 2015;23(2):166–74.
  38. Bronfenbrenner U. *Ecology of Human Development: Experiments by Nature and*

- Design. Cambridge, MA: Harvard University Press.; 1979.
39. Kumanyika SK, Obarzanek E, Stettler N, Bell R, Field AE, Fortmann SP, et al. Population-based prevention of obesity: The need for comprehensive promotion of healthful eating, physical activity, and energy balance: A scientific statement from American Heart Association Council on Epidemiology and Prevention, Interdisciplinary Commi. *Circulation*. 2008;118(4):428–64.
  40. McLeroy KR, Bibeau D, Steckler A, Glanz K. An Ecological Perspective on Health Promotion Programs. *Heal Educ & Behaviour*. 1988;15(4):351–77.
  41. WHO. Regional guidelines: development of health-promoting schools - a framework for action [Internet]. 1996. Available from: <http://iris.wpro.who.int/handle/10665.1/1435>
  42. Richard L, Gauvin L, Raine K. Ecological Models Revisited: Their Uses and Evolution in Health Promotion Over Two Decades. *Annu Rev Public Health* [Internet]. 2011 Apr 21 [cited 2019 Dec 22];32(1):307–26. Available from: <http://www.annualreviews.org/doi/10.1146/annurev-publhealth-031210-101141>
  43. McLaren L, Hawe P. Ecological perspectives in health research. *J Epidemiol Community Health*. 2005;59(1):6–14.
  44. Townsend N, Foster C. Developing and applying a socio-ecological model to the promotion of healthy eating in the school. *Public Health Nutr*. 2013;16(6):1101–8.
  45. Golden SD, Earp JAL. Social Ecological Approaches to Individuals and Their Contexts: Twenty Years of Health Education & Behavior Health Promotion Interventions. *Heal Educ Behav*. 2012;39(3):364–72.
  46. Wiseman AW, Sadaawi A, Alromi NH. Educational Indicators and National Development in Saudi Arabia. In: Paper presented at the 3rd IEA International Research Conference 18-20 September 2008 – Taipei City, Taiwan. 2008.
  47. Higgins JPT, Sterne JAC, Savović J, Page MJ, Hróbjartsson A, Boutron I, Reeves B ES. A revised tool for assessing risk of bias in randomized trials. *Cochrane Database Syst Rev* [Internet]. 2016;10(2016):1–4. Available from: <http://www.nccmt.ca/resources/search/280>.
  48. Moher D, Liberati A, Tetzlaff J, Altman DG. Preferred Reporting Items for Systematic Reviews and Meta-Analyses : The PRISMA Statement. *PLoS Med*.

- 2009;6(7):e1000097.
49. Cecchetto FH, Pellanda LC. Construction and validation of a questionnaire on the knowledge of healthy habits and risk factors for cardiovascular disease in schoolchildren. *J Pediatr* [Internet]. 2014;90(4):415–9. Available from: [http://www.scielo.br/scielo.php?script=sci\\_arttext&pid=S0021-75572014000400415](http://www.scielo.br/scielo.php?script=sci_arttext&pid=S0021-75572014000400415)
  50. Shah A, Aishath, Oran A, Farhana H, Azreena, M FD, et al. Knowledge, Attitude and Practice Regarding Healthy Diet and Physical Activity Among Overweight or Obese Children. *Int J Public Heal Clin Sci*. 2018;5(4).
  51. Bajinka O, Badjan M. Assessing The Awareness, Attitude and Practice of Students in The Public Health and Education Department, University of The Gambia. *Acta Sci Med Sci*. 2019;3(3):52–62.
  52. Klakk H, Wester CT, Olesen LG, Rasmussen MG, Kristensen PL, Pedersen J, et al. The development of a questionnaire to assess leisure time screen-based media use and its proximal correlates in children (SCREENS-Q). *BMC Public Health* [Internet]. 2020 May 12 [cited 2020 Aug 3];20(1). Available from: <https://pubmed.ncbi.nlm.nih.gov/32397984/>
  53. Australian Bureau of Statistics 2011/12. Australia's Physical Activity and Sedentary Behaviour Guidelines and the Australian 24-Hour Movement Guidelines [Internet]. Australian Government Department of Health; 2013 [cited 2020 Aug 3]. Available from: <https://www.abs.gov.au/AUSSTATS/abs@.nsf/DetailsPage/4364.0.55.0042011-12?OpenDocument>
  54. Whati L, Senekal M, Steyn N, Nel J, Lombard C, Norris S. Development of a reliable and valid nutritional knowledge questionnaire for urban South African adolescents. *Nutrition*. 2005;21(1):76-85
  55. Frobisher C, Maxwell SM. The attitudes and nutritional knowledge of a group of 11-12 year olds in Merseyside. *Int J Heal Promot Educ* [Internet]. 2001 [cited 2020 Aug 3];39(4):121–7. Available from: <https://www.tandfonline.com/doi/abs/10.1080/14635240.2001.10806187>
  56. NSW Health. School Students Behaviour Survey: HealthStats NSW. 2016;1–24. Available from: <https://www.health.nsw.gov.au/surveys/student/Documents/student->



- 1  
2  
3 health-survey-2017-quest.pdf  
4  
5  
6 57. Lemeshow S, Hosmer DW, Klar J, Lwanga SK. Adequacy of Sample Size in Health  
7 Studies [Internet]. WHO. New York,USA: JOHN WILEY &SONS,INC; 1990. 68–70  
8 p. Available from: <https://doi.org/10.1186/1472-6963-14-335>  
9  
10  
11 58. Shackman G. Sample size and design effect. Retrieved from [Internet]. Chapter of  
12 American Statistical Association. NYS DOH; 2001. Available from:  
13 <http://faculty.smu.edu/slstokes/stat6380/deff doc.pdf>  
14  
15  
16  
17 59. Stewart A, Marfell-Jones M, Olds T, Ridder H de. International standards for  
18 anthropometric assessment. Edition 2011, editor. International Society for the  
19 Advancement of Kinanthropometry. Routledge; 2011. 264 p.  
20  
21  
22  
23 60. Yorkin M, Spaccarotella K, Martin-Biggers J, Quick V, Byrd-Bredbenner C. Accuracy  
24 and consistency of weights provided by home bathroom scales. BMC Public Health.  
25 2013;13(1):1–5.  
26  
27  
28  
29 61. Himes JH. Challenges of accurately measuring and using BMI and other indicators of  
30 obesity in children. Vol. 124, Pediatrics. 2009.  
31  
32  
33 62. Howard-Drake EJ, Halliday V. Exploring primary school headteachers' perspectives on  
34 the barriers and facilitators of preventing childhood obesity. J Public Health (Bangkok).  
35 2016;38(1):44–52.  
36  
37  
38  
39 63. Schuler BR, Saksvig BI, Nduka J, Beckerman S, Jaspers L, Black MM, et al. Barriers  
40 and Enablers to the Implementation of School Wellness Policies: An Economic  
41 Perspective. Health Promot Pract. 2018;19(6):873–83.  
42  
43  
44  
45 64. Clarke J, Fletcher B, Lancashire E, Pallan M, Adab P. The views of stakeholders on the  
46 role of the primary school in preventing childhood obesity: A qualitative systematic  
47 review. Vol. 14, Obesity Reviews. 2013. p. 975–88.  
48  
49  
50  
51 65. Della Torre Swiss SB, Akre C, Suris JC. Obesity prevention opinions of school  
52 stakeholders: A Qualitative Study. J Sch Health. 2010 May;80(5):233–9.  
53  
54  
55 66. Patino-Fernandez AM, Hernandez J, Villa M, Delamater A. School-based health  
56 promotion intervention: Parent and school staff perspectives. J Sch Health. 2013  
57 Nov;83(11):763–70.  
58  
59  
60

- 1  
2  
3  
4  
5  
6  
7  
8  
9  
10  
11  
12  
13  
14  
15  
16  
17  
18  
19  
20  
21  
22  
23  
24  
25  
26  
27  
28  
29  
30  
31  
32  
33  
34  
35  
36  
37  
38  
39  
40  
41  
42  
43  
44  
45  
46  
47  
48  
49  
50  
51  
52  
53  
54  
55  
56  
57  
58  
59  
60
67. Schetzina KE, Dalton WT, Lowe EF, Azzazy N, Vonwerssowetz KM, Givens C, et al. Developing a coordinated school health approach to child obesity prevention in rural Appalachia: results of focus groups with teachers, parents, and students. *Rural Remote Health* [Internet]. 2009 [cited 2019 Dec 10];9(4):1157. Available from: <http://www.ncbi.nlm.nih.gov/pubmed/19877760>
  68. Sutton J, Austin Z. *Qualitative Research : Data Collection , Analysis , and Management*. *Can J Hosp Pharm*. 2015;68(3):226–31.
  69. Langford R, Bonell C, Jones H, Campbell R. Obesity prevention and the Health promoting Schools framework: essential components and barriers to success. *Int J Behav Nutr Phys Act* [Internet]. 2015 Dec 13 [cited 2019 Nov 15];12(1):15. Available from: <https://ijbnpa.biomedcentral.com/articles/10.1186/s12966-015-0167-7>
  70. Broyles ST, Drazba KT, Church TS, Chaput J-P, Fogelholm M, Hu G, et al. Development and reliability of an audit tool to assess the school physical activity environment across 12 countries. *Int J Obes Suppl*. 2015 Dec;5(S2):S36–42.
  71. Champagne CM, Chaput J-P, Tudor-Locke C, Hu G, Barreira T V, Church TS, et al. The International Study of Childhood Obesity, Lifestyle and the Environment (ISCOLE): design and methods. *BMC Public Health*. 2013;13(1).
  72. WAHPSA. Health Promoting Schools Framework [Internet]. 2014 [cited 2019 May 30]. p. 1–5. Available from: <http://www.hpb.gov.sg/HOPPortal/programmes-article/3128>
  73. Lee C, Kim HJ, Dowdy DM, Hoelscher DM, Ory MG. TCOPPE School Environmental Audit Tool: Assessing Safety and Walkability of School Environments. *J Phys Act Heal* [Internet]. 2013 [cited 2019 Oct 22];10:949–60. Available from: [www.JPAH-Journal.com](http://www.JPAH-Journal.com)
  74. Lytle LA. Examining the etiology of childhood obesity: The IDEA study. *Am J Community Psychol*. 2009;44(3):338–49.
  75. Brown TA, Moore MT. Handbook of structural equation modeling. In: *Confirmatory Factor Analysis*. New York, NY, US: The Guilford Press; 2012. p. 361–79.
  76. Taherdoost H. Validity and Reliability of the Research Instrument; How to Test the Validation of a Questionnaire/Survey in a Research. *Int J Acad Res Manag*. 2016;5(3):28–36.

- 1  
2  
3 77. Mundfrom DJ, Shaw DG, Ke TL. Minimum Sample Size Recommendations for  
4 Conducting Factor Analyses. *Int J Test* [Internet]. 2005 [cited 2019 Dec 6];5(2):159–68.  
5 Available from:  
6 <https://www.tandfonline.com/action/journalInformation?journalCode=hijt20>  
7  
8  
9  
10  
11 78. Jr. JFH, Black WC, Babin BJ, Anderson RE. 3. Exploratory Factor Analysis. In:  
12 *Multivariate Data Analysis Hair Black Babin Anderson* [Internet]. Seventh Ed. 2014  
13 [cited 2019 Dec 6]. p. 89–150. Available from: [www.pearsoned.co.uk](http://www.pearsoned.co.uk)  
14  
15  
16  
17 79. Tavakol M, Dennick R. Making sense of Cronbach ' s alpha. *Int J Med Educ*. 2011;2:53–  
18 5.  
19  
20  
21 80. Gliner JA, Morgan GA, Harmon RJ. Measurement reliability. *J Am Acad Child Adolesc*  
22 *Psychiatry* [Internet]. 2001;40(4):486–8. Available from:  
23 <http://dx.doi.org/10.1097/00004583-200104000-00019>  
24  
25  
26  
27 81. Weiner J. *Measurement : Reliability and Validity Measures*. 2007;  
28  
29  
30 82. Tabachnick BG, Fidell LS. *Using Multivariate Statistics* [Internet]. 6th Editio. 2013. 128  
31 p. Available from: [https://www.pearson.com/us/higher-education/program/Tabachnick-](https://www.pearson.com/us/higher-education/program/Tabachnick-Using-Multivariate-Statistics-6th-Edition/PGM332849.html)  
32 [Using-Multivariate-Statistics-6th-Edition/PGM332849.html](https://www.pearson.com/us/higher-education/program/Tabachnick-Using-Multivariate-Statistics-6th-Edition/PGM332849.html)  
33  
34  
35 83. Zainuddin Awang. *VALIDATING THE MEASUREMENT MODEL: CFA*. In: *SEM*  
36 *Made Simple : a Gentle Approach to Learning Structural Equation Modeling*. MPWS  
37 Rich Publication; 2015.  
38  
39  
40  
41 84. Schermelleh-Engel K, Moosbrugger H, Müller H. Evaluating the Fit of Structural  
42 Equation Models: Tests of Significance and Descriptive Goodness-of-Fit Measures.  
43 Vol. 8, *Methods of Psychological Research Online*. 2003.  
44  
45  
46  
47 85. Andy Field. *Discovering Statistics Using IBM SPSS Statistics* [Internet]. Fourth edi.  
48 London: SAGE Publications Inc.; 2013 [cited 2019 Dec 10]. Available from:  
49 [https://books.google.co.nz/books?hl=en&lr=&id=c0Wk9IuBmAoC&oi=fnd&pg=PP2](https://books.google.co.nz/books?hl=en&lr=&id=c0Wk9IuBmAoC&oi=fnd&pg=PP2&ots=LbGnGG-u3H&sig=A6dblN8tUIo9xYdhoPn2z40aY3c&redir_esc=y#v=onepage&q&f=false)  
50 [&ots=LbGnGG-](https://books.google.co.nz/books?hl=en&lr=&id=c0Wk9IuBmAoC&oi=fnd&pg=PP2&ots=LbGnGG-u3H&sig=A6dblN8tUIo9xYdhoPn2z40aY3c&redir_esc=y#v=onepage&q&f=false)  
51 [u3H&sig=A6dblN8tUIo9xYdhoPn2z40aY3c&redir\\_esc=y#v=onepage&q&f=false](https://books.google.co.nz/books?hl=en&lr=&id=c0Wk9IuBmAoC&oi=fnd&pg=PP2&ots=LbGnGG-u3H&sig=A6dblN8tUIo9xYdhoPn2z40aY3c&redir_esc=y#v=onepage&q&f=false)  
52  
53  
54  
55  
56 86. Lichtman M. *Qualitative Research in Education: A User's Guide*. second. California:  
57 sage; 2010.  
58  
59  
60 87. Braun V, Clarke V. Using thematic analysis in psychology. In: *Qualitative Research in*

1  
2  
3 Psychology. 2006. p. 77–101.  
4

- 5  
6 88. Vaismoradi M, Jones J, Turunen H, Snelgrove S. Theme development in qualitative  
7 content analysis and thematic analysis. J Nurs Educ Pract. 2016;6(5).  
8  
9  
10 89. Western Australian University Sector Disposal Authority. (2013.). Retrieved from  
11 [http://www.sro.wa.gov.au/sites/default/files/western\\_australian\\_university\\_sector\\_disposal\\_authority\\_sd2011011.pdf](http://www.sro.wa.gov.au/sites/default/files/western_australian_university_sector_disposal_authority_sd2011011.pdf)  
12  
13  
14  
15  
16  
17  
18  
19  
20  
21  
22  
23  
24  
25  
26  
27  
28  
29  
30  
31  
32  
33  
34  
35  
36  
37  
38  
39  
40  
41  
42  
43  
44  
45  
46  
47  
48  
49  
50  
51  
52  
53  
54  
55  
56  
57  
58  
59  
60

For peer review only

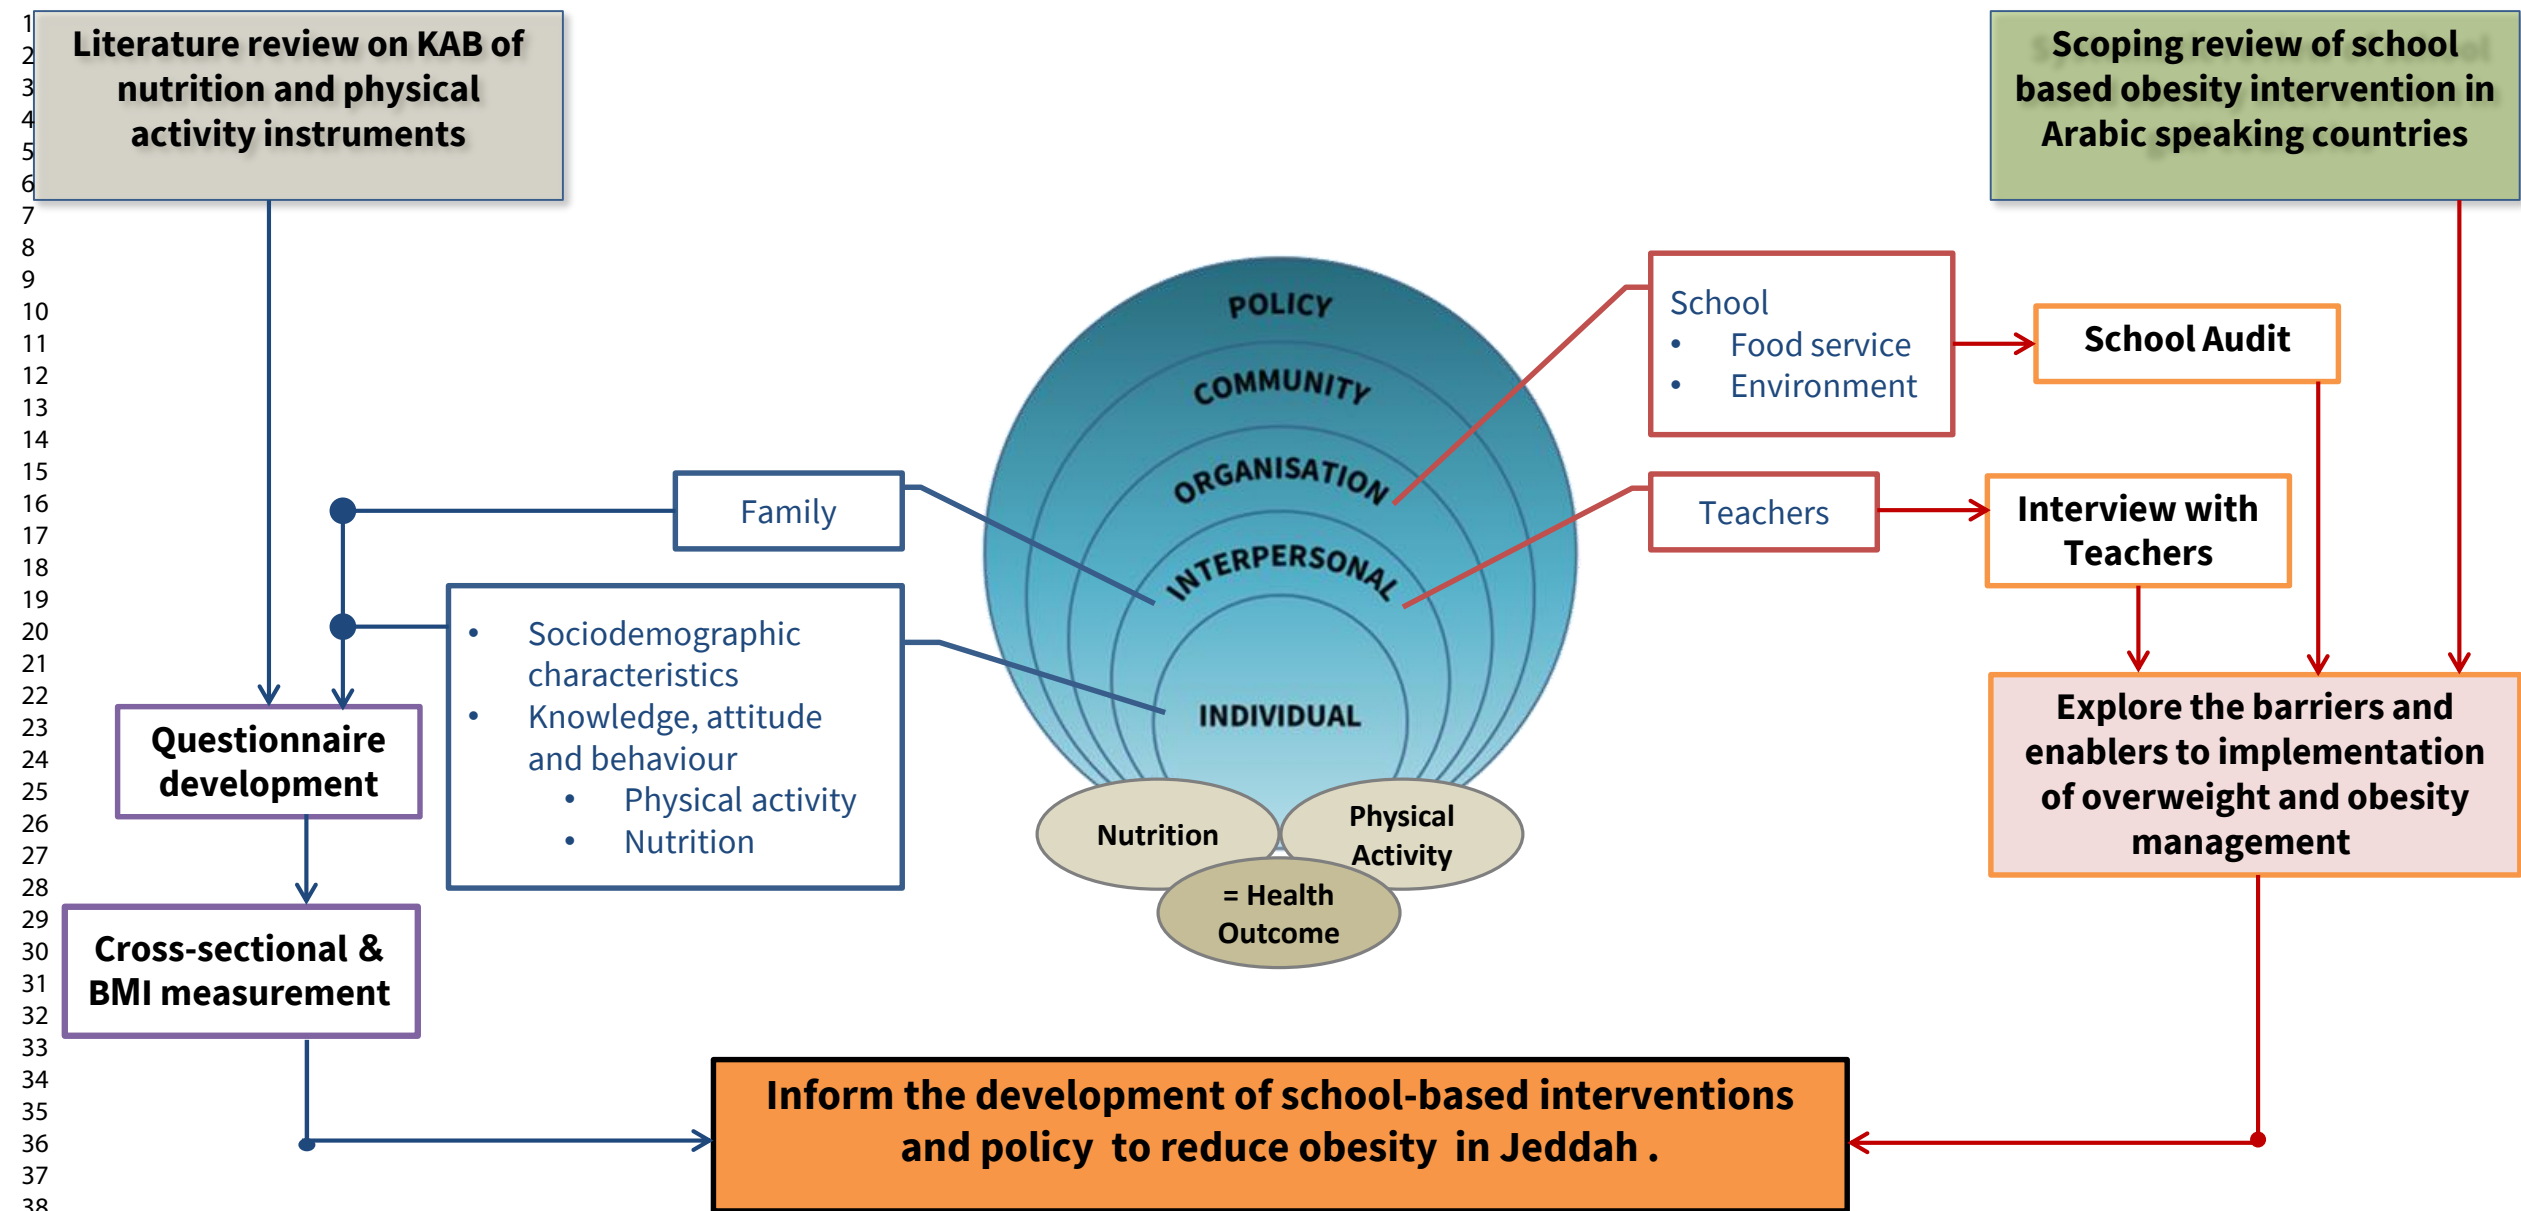

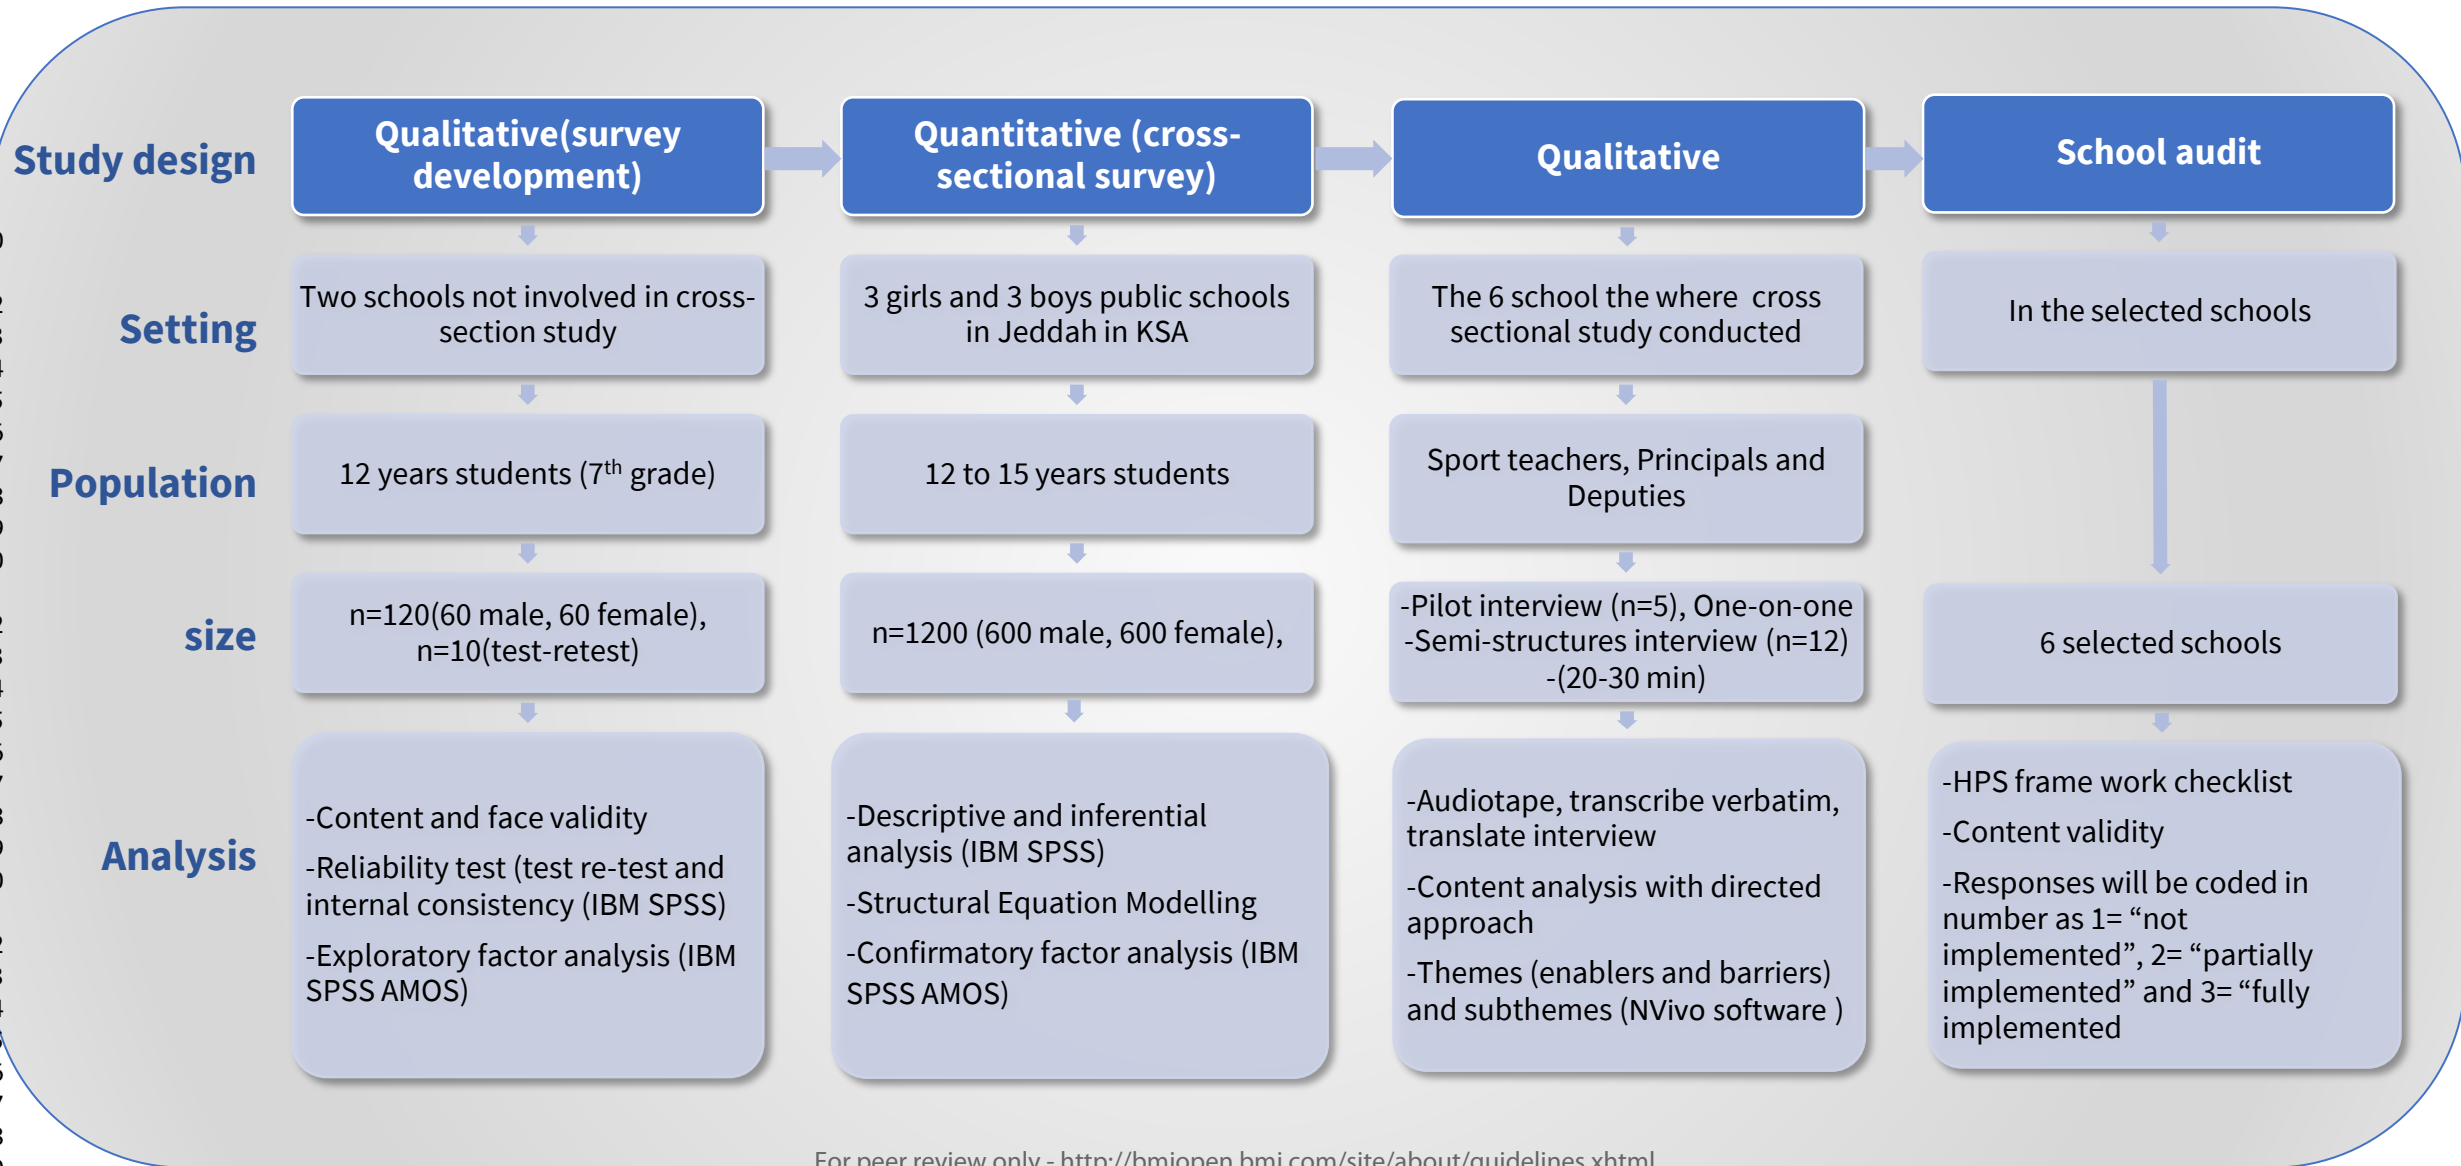

1  
2  
3  
4  
5  
6  
7  
8  
9  
10  
11  
12  
13  
14  
15  
16  
17  
18  
19  
20  
21  
22  
23  
24  
25  
26  
27  
28  
29  
30  
31  
32  
33  
34  
35  
36  
37  
38  
39  
40  
41

1  
2  
3  
4  
5  
6  
7  
8  
9  
10  
11  
12  
13  
14  
15  
16  
17  
18  
19  
20  
21  
22  
23  
24  
25  
26  
27  
28  
29  
30  
31  
32  
33  
34  
35  
36  
37  
38  
39  
40  
41

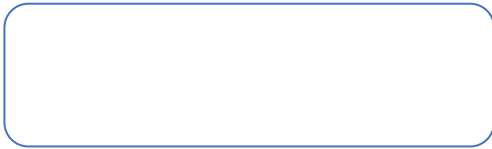

**STROBE 2007 (v4) Statement—Checklist of items that should be included in reports of *cross-sectional studies***

| Section/Topic                | Item # | Recommendation                                                                                                                                                                       | Reported on page # |
|------------------------------|--------|--------------------------------------------------------------------------------------------------------------------------------------------------------------------------------------|--------------------|
| <b>Title and abstract</b>    | 1      | (a) Indicate the study's design with a commonly used term in the title or the abstract                                                                                               | 1-2                |
|                              |        | (b) Provide in the abstract an informative and balanced summary of what was done and what was found                                                                                  |                    |
| <b>Introduction</b>          |        |                                                                                                                                                                                      |                    |
| Background/rationale         | 2      | Explain the scientific background and rationale for the investigation being reported                                                                                                 | 2-4                |
| Objectives                   | 3      | State specific objectives, including any prespecified hypotheses                                                                                                                     |                    |
| <b>Methods</b>               |        |                                                                                                                                                                                      |                    |
| Study design                 | 4      | Present key elements of study design early in the paper                                                                                                                              | 4                  |
| Setting                      | 5      | Describe the setting, locations, and relevant dates, including periods of recruitment, exposure, follow-up, and data collection                                                      | 5                  |
| Participants                 | 6      | (a) Give the eligibility criteria, and the sources and methods of selection of participants                                                                                          | 8-9                |
| Variables                    | 7      | Clearly define all outcomes, exposures, predictors, potential confounders, and effect modifiers. Give diagnostic criteria, if applicable                                             | 8-9                |
| Data sources/<br>measurement | 8*     | For each variable of interest, give sources of data and details of methods of assessment (measurement). Describe comparability of assessment methods if there is more than one group | 9-10               |
| Bias                         | 9      | Describe any efforts to address potential sources of bias                                                                                                                            |                    |
| Study size                   | 10     | Explain how the study size was arrived at                                                                                                                                            | 8-9                |
| Quantitative variables       | 11     | Explain how quantitative variables were handled in the analyses. If applicable, describe which groupings were chosen and why                                                         | 9                  |
| Statistical methods          | 12     | (a) Describe all statistical methods, including those used to control for confounding                                                                                                | 11-13              |
|                              |        | (b) Describe any methods used to examine subgroups and interactions                                                                                                                  |                    |
|                              |        | © Explain how missing data were addressed                                                                                                                                            |                    |
|                              |        | (d) If applicable, describe analytical methods taking account of sampling strategy                                                                                                   |                    |
|                              |        | (e) Describe any sensitivity analyses                                                                                                                                                |                    |
| <b>Results</b>               |        |                                                                                                                                                                                      |                    |



|                          |     |                                                                                                                                                                                                                                                                                                                                                                                                               |     |
|--------------------------|-----|---------------------------------------------------------------------------------------------------------------------------------------------------------------------------------------------------------------------------------------------------------------------------------------------------------------------------------------------------------------------------------------------------------------|-----|
| Participants             | 13* | (a) Report numbers of individuals at each stage of study—eg numbers potentially eligible, examined for eligibility, confirmed eligible, included in the study, completing follow-up, and analysed<br>(b) Give reasons for non-participation at each stage<br>(c) Consider use of a flow diagram                                                                                                               | 8-9 |
| Descriptive data         | 14* | (a) Give characteristics of study participants (eg demographic, clinical, social) and information on exposures and potential confounders<br>(b) Indicate number of participants with missing data for each variable of interest                                                                                                                                                                               |     |
| Outcome data             | 15* | Report numbers of outcome events or summary measures                                                                                                                                                                                                                                                                                                                                                          |     |
| Main results             | 16  | (a) Give unadjusted estimates and, if applicable, confounder-adjusted estimates and their precision (eg, 95% confidence interval). Make clear which confounders were adjusted for and why they were included<br>(b) Report category boundaries when continuous variables were categorized<br>(c) If relevant, consider translating estimates of relative risk into absolute risk for a meaningful time period |     |
| Other analyses           | 17  | Report other analyses done—eg analyses of subgroups and interactions, and sensitivity analyses                                                                                                                                                                                                                                                                                                                |     |
| <b>Discussion</b>        |     |                                                                                                                                                                                                                                                                                                                                                                                                               |     |
| Key results              | 18  | Summarise key results with reference to study objectives                                                                                                                                                                                                                                                                                                                                                      |     |
| Limitations              | 19  | Discuss limitations of the study, taking into account sources of potential bias or imprecision. Discuss both direction and magnitude of any potential bias                                                                                                                                                                                                                                                    |     |
| Interpretation           | 20  | Give a cautious overall interpretation of results considering objectives, limitations, multiplicity of analyses, results from similar studies, and other relevant evidence                                                                                                                                                                                                                                    |     |
| Generalisability         | 21  | Discuss the generalisability (external validity) of the study results                                                                                                                                                                                                                                                                                                                                         |     |
| <b>Other information</b> |     |                                                                                                                                                                                                                                                                                                                                                                                                               |     |
| Funding                  | 22  | Give the source of funding and the role of the funders for the present study and, if applicable, for the original study on which the present article is based                                                                                                                                                                                                                                                 | 14  |

\*Give information separately for cases and controls in case-control studies and, if applicable, for exposed and unexposed groups in cohort and cross-sectional studies.

**Note:** An Explanation and Elaboration article discusses each checklist item and gives methodological background and published examples of transparent reporting. The STROBE checklist is best used in conjunction with this article (freely available on the Web sites of PLoS Medicine at <http://www.plosmedicine.org/>, Annals of Internal Medicine at <http://www.annals.org/>, and Epidemiology at <http://www.epidem.com/>). Information on the STROBE Initiative is available at [www.strobe-statement.org](http://www.strobe-statement.org).

# BMJ Open

## Identifying Factors Associated with Overweight and Obesity among Intermediate School Students Aged 12-15 Years in School Settings: Mixed Methodology Protocol

|                                 |                                                                                                                                                                                                                                                                   |
|---------------------------------|-------------------------------------------------------------------------------------------------------------------------------------------------------------------------------------------------------------------------------------------------------------------|
| Journal:                        | <i>BMJ Open</i>                                                                                                                                                                                                                                                   |
| Manuscript ID                   | bmjopen-2020-045877.R1                                                                                                                                                                                                                                            |
| Article Type:                   | Protocol                                                                                                                                                                                                                                                          |
| Date Submitted by the Author:   | 23-Feb-2021                                                                                                                                                                                                                                                       |
| Complete List of Authors:       | Almutairi, Naif; Curtin University Bentley Campus, School of Public Health<br>Burns, Sharyn; Curtin University, Western Australian Centre for Health Promotion Research, School of Public Health<br>Portsmouth, Linda; Curtin University, School of Public Health |
| <b>Primary Subject Heading</b>: | Public health                                                                                                                                                                                                                                                     |
| Secondary Subject Heading:      | Public health                                                                                                                                                                                                                                                     |
| Keywords:                       | PUBLIC HEALTH, Public health < INFECTIOUS DISEASES, NUTRITION & DIETETICS                                                                                                                                                                                         |
|                                 |                                                                                                                                                                                                                                                                   |

SCHOLARONE™  
Manuscripts



I, the Submitting Author has the right to grant and does grant on behalf of all authors of the Work (as defined in the below author licence), an exclusive licence and/or a non-exclusive licence for contributions from authors who are: i) UK Crown employees; ii) where BMJ has agreed a CC-BY licence shall apply, and/or iii) in accordance with the terms applicable for US Federal Government officers or employees acting as part of their official duties; on a worldwide, perpetual, irrevocable, royalty-free basis to BMJ Publishing Group Ltd ("BMJ") its licensees and where the relevant Journal is co-owned by BMJ to the co-owners of the Journal, to publish the Work in this journal and any other BMJ products and to exploit all rights, as set out in our [licence](#).

The Submitting Author accepts and understands that any supply made under these terms is made by BMJ to the Submitting Author unless you are acting as an employee on behalf of your employer or a postgraduate student of an affiliated institution which is paying any applicable article publishing charge ("APC") for Open Access articles. Where the Submitting Author wishes to make the Work available on an Open Access basis (and intends to pay the relevant APC), the terms of reuse of such Open Access shall be governed by a Creative Commons licence – details of these licences and which [Creative Commons](#) licence will apply to this Work are set out in our licence referred to above.

Other than as permitted in any relevant BMJ Author's Self Archiving Policies, I confirm this Work has not been accepted for publication elsewhere, is not being considered for publication elsewhere and does not duplicate material already published. I confirm all authors consent to publication of this Work and authorise the granting of this licence.

1  
2  
3  
4 **Identifying Factors Associated with Overweight and Obesity among Intermediate School**  
5 **Students Aged 12-15 Years in School Settings: Mixed Methodology Protocol**  
6

7 Naif Almutairi<sup>1</sup>, Sharyn Burns<sup>1</sup>, Linda Portsmouth<sup>1</sup>  
8  
9

10 <sup>1</sup>School of Public Health, Bentley Campus, Curtin University, Australia  
11  
12  
13

14  
15 Correspondence\*:  
16

17 Naif Almutairi<sup>1</sup>  
18 School of Population Health,  
19 Curtin University  
20 postal address: 1308/ 63 Adelaide Terrace,  
21 East Perth, WA 6004,  
22 Australia  
23 E-mail: naif.almutairi@postgrad.curtin.edu.au  
24 Phone: +61478166449  
25  
26  
27

28 **Key words: Obesity, Children, Adolescents, Mixed-methodology, Kingdom of Saudi**  
29 **Arabia**  
30  
31  
32  
33  
34  
35

36 **Word count: 3987**  
37  
38  
39  
40  
41  
42  
43  
44  
45  
46  
47  
48  
49  
50  
51  
52  
53  
54  
55  
56  
57  
58  
59  
60

## Abstract

### Introduction

Childhood obesity is a public health concern globally. In Arab countries, the prevalence of overweight and obesity has increased significantly over the last three decades. The level of childhood overweight and obesity in the Kingdom of Saudi Arabia (KSA) is high and continues to increase. This study will explore factors associated with overweight and obesity among adolescents and identify barriers and enablers to the implementation of comprehensive school-based obesity prevention interventions.

### Methods and Analysis

Socio-ecological Model will inform this mixed methods study. The study will include three phases: (1) a scoping review of the literature; (2) the development of a student survey instrument; and (3) a mixed-method study comprising a cross-sectional survey targeting students aged 12-15 years with the collection of the students' height and weight measurements; one-on-one interviews with physical education teachers and school principals; and the administration of school climate audits using the Health Promoting School (HPS) framework. Reliability and validity of the survey instrument will be examined during survey development. Descriptive, inferential and thematic analysis will be employed using appropriate statistical software.

### Ethics and Dissemination

Ethical approval has been granted from the Curtin University of Human Research Ethics Committee (HR2020-0337) and from the KSA Ministry of Education (4181827686). School principals will provide permission to conduct the study in individual schools. Individual consent/assent will be obtained from students and their parents, and teachers. Study findings will be disseminated via peer-review publications, reports and conferences.

### Strengths and limitations of this study

- The study will employ multiple methodologies to explore barriers and enablers within a school context to inform the development of interventions to reduce the prevalence of overweight and obesity among adolescents.
- The validated student survey and whole school Audit tools will be enhance school-based planning.

- A review of the published literature has indicated that this will be the first mixed methods study to collecting data from students and teachers to specifically inform the development of whole school interventions and policy focusing on obesity preventions. Findings will inform school-based interventions in KSA.
- Participants will be recruited from intermediate level students from multiple schools; however, the study will be conducted only in one region of KSA, Jeddah.

For peer review only

## Introduction

Obesity in general, and childhood obesity specifically, is a key public health issue in many high-income countries (HIC) and is a steadily rising public health problem in low- and middle-income countries (LMIC). Globally, the overall overweight and obesity prevalence has nearly tripled since the mid-1970s and it is the fifth most common cause of mortality globally, contributing to at least 2.8 million deaths per year (1,2). Obesity among children and adolescents is associated with a range of psychological health issues including depression (3,4), low self-esteem (5) and increased risk of infections (6). Childhood obesity is also a risk factor for several non-communicable chronic diseases in adulthood (7) such as diabetes (8), hypertension (9), musculoskeletal disorders (10) and heart disease (11). It also impacts academic outcomes of school students, overall quality of life (12) and has been linked to psychosocial factors such as weight-based teasing (13). Obesity is also responsible for deaths in later life as a complication of chronic diseases (14,15). There is a substantial direct and indirect economic burden attributed to childhood overweight and obesity (16). Studies have reported costs attributable to overweight and obesity are three times higher for men and nearly five times higher for women with a history of childhood obesity (17,18).

During the past three decades, the prevalence of overweight and obesity in Arabic speaking countries has steadily increased (19). A study among adults involving 52 countries found the Middle East region to score the highest mean body mass index after North America (20). The increasing prevalence of overweight and obesity among children and adolescents in Eastern Mediterranean countries has reached a critical level where the prevalence of overweight and obese adolescents is greater than adolescents classified as normal weight (21). In a review conducted among children under 12 years in the Gulf countries, there was a 5%-14% and 3%-18% prevalence of obesity among males and females respectively (22).

Similarly, the level of childhood overweight and obesity in the Kingdom of Saudi Arabia (KSA) is high and continues to increase (23,24). A study in 2012 in KSA among 19,317 children and adolescents (aged 5-18 years) found the prevalence of overweight, obesity and severe obesity to be 23%, 9% and 2%, respectively (25). Another recent study in 2015 in KSA among 7930 children aged 6-16 years reported 13% to be overweight and 18% to be obese (26). In recent decades, the population of KSA has undergone a nutritional transition where traditional food is being substituted by fast food which is usually energy-dense and nutrient-poor (27). The consumption of unhealthy foods and sugary carbonated drinks, especially

1  
2  
3 among children and adolescents is increasing at a rapid rate (28). In addition, Saudi people are  
4 more likely to adopt sedentary lifestyles when compared to other non-Arab cultures (29). The  
5 increased socio-economic status of KSA residents has also resulted in increased use of personal  
6 cars for transportation and an increase in indoor games and television viewing which has  
7 resulted in children and adolescents being less likely to walk to school and play outdoors than  
8 in the past (30).  
9

10  
11  
12  
13  
14 Considering the increased prevalence along with the health and economic issues associated  
15 with childhood obesity, effective programs to encourage physical activity and improve healthy  
16 eating behaviours to prevent obesity are imperative (31). Schools have been identified as an  
17 ideal setting to promote health given the association between health and education along with  
18 the amount of time children and adolescents spend at school (32).  
19

20  
21  
22  
23  
24 The Health-Promoting Schools (HPS) Framework is adopted by the World Health  
25 Organization and recommends a whole of school approach to promote healthy schools.  
26 (33,34). The HPS Framework focuses on the domains of Curriculum, Teaching and Learning;  
27 School Organisation, Ethos and Environment; and Partnerships and Services.  
28  
29

30  
31  
32  
33  
34  
35  
36  
37  
38  
39  
40  
41  
42  
43  
44  
45  
46  
47  
48  
49  
50  
51  
52  
53  
54  
55  
56  
57  
58  
59  
60  
Published research in KSA has primarily focused on a single element in regards to the  
determinants of weight-related issues among adolescents including anthropometric  
measurement (35); dietary patterns such as eating in restaurants; and sedentary lifestyles with  
low levels of physical activity (23,36). There is no published research that focuses on broader  
socio-ecological influences of overweight and obesity among Saudi children and adolescents  
within the school setting (37). This study aims to address this gap by adopting a mixed methods  
approach to explore factors associated with overweight and obesity among Intermediate School  
students aged 12-15 years within the school setting in Jeddah, KSA

## Methods

### Objectives

The specific objectives of the study are: a) to identify self-reported physical activity and  
nutrition knowledge, attitudes, and behaviours; b) to determine the association between BMI,  
sociodemographic factors, and nutrition and physical activity related knowledge, attitudes, and  
behaviours; and c) to explore barriers and enablers to the implementation of comprehensive  
school-based obesity prevention interventions perceived by schoolteachers and school



1  
2  
3 principals; and d) undertake school audits to determine factors within the schools that may  
4 influence overweight and obesity.  
5  
6

### 7 **Research design**

8  
9  
10 This mixed methods study will be informed by the Social-Ecological Model (SEM) (38)  
11 which has been used in the context of obesity elsewhere (39,40). The Health Promoting  
12 Schools (HPS) Framework will also inform the study design (41). This study will be conducted  
13 in three phases: (1) a scoping review of the literature; (2) the development of a student survey  
14 instrument; and (3) a mixed methods study comprising a cross-sectional survey of students  
15 aged 12-15 years investigating their knowledge, attitudes, and behaviours with regard to  
16 physical activity and nutrition; the collection of student BMI measurements; one-on-one  
17 interviews with physical education teachers and school principals; and school climate audits.  
18  
19  
20  
21  
22  
23

### 24 **Theoretical framework**

25  
26  
27 Major tenets of the SEM acknowledge and situate adolescents within their environment and  
28 further recognize the position of ecology or contextual elements for children within their family  
29 and wider social context (42). The theory posits that the health and health behaviours of  
30 individuals are interconnected with their surroundings, and that environment needs to be  
31 understood in order to explain health (40,42,43). In essence, the socio-ecological perspective  
32 considers a more comprehensive view of the influences on childhood and adolescent  
33 overweight and obesity (44). The SEM recognizes influences at the student, interpersonal  
34 (family, peers and teachers), school environment, community and policy levels (45). The  
35 factors associated with childhood overweight and obesity are multifactorial and interconnected,  
36 hence the social-ecological framework (SEM) will be used to inform this study. Figure 1  
37 describes the interrelationship between the SEM and the study design.  
38  
39  
40  
41  
42  
43  
44  
45

### 46 **Setting**

47  
48  
49 The study will be conducted in Jeddah City, KSA in three boys' and three girls' Intermediate  
50 Schools. Schools will be randomly selected from 262 Intermediate Government Schools,  
51 recruiting approximately even numbers of males and females. Students (Grades 7 to 9; 12 – 15  
52 years), teachers and principals will be invited to participate in the study. In KSA, all schools  
53 are single gender (46).  
54  
55  
56  
57  
58  
59  
60

## **Phase One: Scoping Review**

A scoping review will be initially conducted to understand school-based obesity prevention interventions in Arabic speaking countries. PICO format (47) will be used to guide the development of the review's question, generating relevant keywords for searching and developing inclusion and exclusion criteria. This review will consider school-based interventions focusing on overweight and obesity prevention (including promotion of healthy eating and physical activity) within schools in predominantly Arabic speaking countries (n=22 countries) within the last 10 years. Finally, a systematic search and screening will be conducted and reported according to the PRISMA flowchart (48).

### ***Search Strategy and Study Selection***

Systematic searches of the following electronic databases will be undertaken through PubMed, Medline, Scopus, CINHAL, Cochrane, ERIC, EMBASE, ProQuest, EBSCO Host and Global Health and manual exploration of relevant publications will be conducted. School-based intervention studies will be included with keywords (Child or Adol\*) and (Bahrain or Kuwait or Oman or Qatar or Saudi Arabia or United Arab Emirates or gulf countries or Gulf Cooperation Council or Algeria or Palestinian Territories or Comoros or Djibouti or Egypt or Iraq or Jordan or Lebanon or Libya or Mauritania or Morocco or Somalia or Sudan or Syria or Tunisia or Yemen) and school and (intervention or program or curriculum or health promotion or health education) and (physical activity or exercise or diet or nutrition or food choices or obesity or overweight or BMI or Body Mass Index or body weight). Inclusion criteria will be studies which focus on school-aged children from five to 18 years, interventions aiming to prevent overweight and obesity, school-based quantitative and/or qualitative intervention studies, peer-reviewed articles published in English or Arabic and articles for which full text is available. Systematic searching will be documented, and duplicates will be removed using reference management software (i.e. EndNote X9). The relevant data extracted from each article will be systematically summarized and tabulated and will be analysed for intervention characteristics, measurable outcomes, and the enablers and barriers of the interventional studies (34).

### **Phase Two: Survey Development:**

A self-report survey will be developed to measure demographics and knowledge, attitudes, and behaviours (KAB) regarding physical activity and nutrition among Grade 7 to 9 students

(Figure 2). The survey will be informed by the literature and where possible previously validated items will be used. The survey be tested for validity and reliability (49). Content validity testing of the survey will be conducted with experts (i.e. public health academics with clinical and education backgrounds from KSA; n = 6-8) initially in English and the final format in Arabic. The survey will be tested for reliability. A test-retest will be conducted in Jeddah KSA with seventh grade (aged 12) students (male, n= 60 and female= 60) from two schools (one male and one female) not involved in the main study. The survey will be administered by a research assistant in a classroom at a time convenient to the school in paper or online. The survey will be administered to the same 60 students two weeks after the initial survey administration. This pilot study will inform the researchers, the minimum and maximum time required to complete the survey.

### ***Instrumentation***

Demographics including age, gender, grade level and parent education level will be collected. Physical activity knowledge will be measured using five questions adapted from a Malaysian study involving 8-11 year old children (responses “True”, “False” and “I don’t know”) (50). Attitudes toward physical activity will be measured using an eight question scale adapted from a university study in Gambia (Likert scale: strongly agree (1) to strongly disagree (5) (51). Physical activity behaviours will be measured using eight questions. The first question uses the SCREENS questionnaire which was originally developed for children aged 6 to 10 years in Denmark (SCREENS-Q). This question includes six-sub questions and focuses on time per day spent on different screen-related activities (52). The remaining five questions were adapted to the KSA intermediate school context from the Australian National Nutrition and Physical Activity Survey which collected data about 5-17-year olds. These questions focus on usual daily activity, level of activity and amount and type of sports activities provided at school (53). Nutrition knowledge will be measured using eight items adapted from a validated nutritional survey developed for use among urban South African adolescents (responses: true, false, I don’t know) (54,55). Eight 8 items adapted from an English survey for 11-12 year olds will measure nutrition attitudes (Likert scale: strongly agree (1) to strongly disagree (5) (55). Nutrition-related behaviours will be measured using nine questions adapted from an Australian school students survey. These questions focus on types and approximate quantities of food consumed

1  
2  
3 on a usual day. Questions focus of fruit, vegetable, bread and cereal, fast food, energy dense  
4 snacks, sugary drinks, milk and water consumption (56).  
5  
6

### 7 **Phase Three: Mixed Methods Study**

8  
9

10 Phase three will comprise the mixed methods study which includes a cross-sectional survey  
11 and BMI measurements with Grade 7 to 9 students. Individual interviews with physical  
12 education teachers and school principals and the administration of school environment audits  
13 will also be undertaken (Figure 2).  
14  
15

#### 16 *Study population and sample size*

17

##### 18 *(a) Cross-sectional and BMI measurements*

19  
20  
21

22 Of the 262 Intermediate Schools in Jeddah, six schools will be randomly selected. A random  
23 sample of six Intermediate Schools will be generated from six different geographical regions  
24 in Jeddah using SPSS random generated sample selection method. Intermediate Schools  
25 include students from Grades 7 to 9. All students within participating classes from each school  
26 will be invited.  
27  
28  
29

30  
31  
32 Principals will provide consent for the school to participate in the study. Parental consent and  
33 student assent will be required for individual student participation. Inclusion criteria will be  
34 children from Grades 7 to 9 who assent to participate and for whom parental consent is  
35 provided. Students who are unable to take the survey for any reason and/or are unable to stand  
36 up long enough to have their height and weight measured (i.e. students who are not cognitively  
37 or physically able to participate) will be excluded from the study.  
38  
39  
40  
41

42  
43 In order to calculate sufficient sample size to ensure representativeness of the study population,  
44 the highest available prevalence of overweight and obesity (23.1%) reported among KSA  
45 children and adolescents in a study by El Mouzan et al., (25) was used. The following formula  
46 was used for sample size calculation: Sample size (n) =  $\frac{Z^2 \cdot \alpha/2 \cdot Pq}{d^2}$  (57). Based on the  
47 formula, the required minimum sample size for Intermediate School (12-15 years old), is 273  
48 participants. To factor in 10% non-response rate, a total of 300 students is required for this  
49 study. Since this study employed cluster sampling a design effect will be employed. A design  
50 effect usually ranges from 1 to 3 (58). Therefore, the design effect of two will be used to reach  
51 a sample size of 600. Since this study is targeting both male and female students, the total  
52 estimated sample size will be 1200 students (600 males and 600 females).  
53  
54  
55  
56  
57  
58  
59  
60

1  
2  
3 ***(b) Interview with school principals and sport teachers***  
4  
5

6 We will aim to recruit six physical education teachers and six principals or deputy principals  
7 (one teacher and one principal/deputy from each school; n= 12). Due to cultural reasons, the  
8 male principal researcher will conduct face to face interviews with male participants and phone  
9 interviews with the female participants.  
10  
11  
12

13 ***(c) School Climate Audit***  
14  
15

16 The principal researcher (or the research assistant for female schools) will complete the school  
17 audit checklist with the school principal or deputy and one physical education teacher.  
18  
19

20 **Data Collection**  
21

22 ***(a) Cross-sectional and BMI measurements***  
23  
24

25 The validated self-administrated survey (developed in Phase 2) will collect demographic  
26 information and physical activity and nutrition knowledge, attitudes and behaviours. The self-  
27 report instrument will be administered via paper or online during class time by the principal  
28 researcher (or research assistant in the girls' schools) with the assistance of the classroom  
29 teachers in each school.  
30  
31  
32

33  
34 The height and weight of consenting students will also be measured. The researcher will follow  
35 the international standards for anthropometric assessment (59). The BMI for age will be  
36 calculated (59). The principal investigator will take the measurements of the male students and  
37 female research assistant will be employed to measure female students and both will be trained  
38 in correct anthropometric measurement techniques. A calibrated digital measuring scale will  
39 be used, and the scale will be reset before measurement. The use of such digital scales has been  
40 supported for good accuracy with evidence (60). Student height will be measured using a  
41 portable stadiometer set up on a hard, flat surface (61). Privacy will be given to each child so  
42 that their measurements are known only to the person taking the measurements. The height and  
43 weight data measurement will be written on the individual survey forms.  
44  
45  
46  
47  
48  
49  
50  
51

52 ***(b) Interview with school principals and sport teachers***  
53  
54

55 Individual in-depth interviews will be conducted with physical education teachers and  
56 principals to explore their beliefs and perceptions of the barriers and enablers to the  
57  
58  
59  
60

1  
2  
3 implementation of school-based interventions focusing on obesity prevention. This is expected  
4 to provide a richer understanding of the topic from the point of view of relevant school staff.  
5  
6

7  
8 The questions will be informed by the results of the systematic review, the cross-sectional study  
9 and relevant literature (62–67), and a semi-structured interview guide will be developed. The  
10 interview guide will be piloted with two teachers uninvolved in the study to estimate the time  
11 the interview can be expected to take and to obtain feedback on the clarity of the interview  
12 questions.  
13  
14  
15

16  
17 The semi-structured one-on-one interviews will be audiotaped, transcribed verbatim,  
18 translated and will be reviewed by the researcher and supervisors to maintain dependability  
19 and determine credibility (68). The translation process will resume after transcription with an  
20 audio converter Arabic to Arabic then the researcher will review all the resulting transcriptions  
21 and adjust for accuracy. The principal investigator will translate for the closest intended  
22 meaning based on his knowledge of English and Arabic then will get this checked by an  
23 Accredited English-Arabic translator.  
24  
25  
26  
27  
28  
29

### 30 ***(c) School Climate Audit***

31 A school climate audit tool will be developed from previous tools based on the Health  
32 Promoting Schools (HPS) Framework (33,69) and will be based on the three interrelated  
33 components of the HPS Framework: curriculum, teaching and learning; school organisation,  
34 ethos and environment; and partnerships and services. (70–72). The tool will be adapted from  
35 the items from four studies with acceptable psychometric levels: a tool developed for multiple  
36 countries with almost perfect reliability ( $\kappa=0.80-0.96$ ) (70); an audit tool focusing on the  
37 walkability of school environments with average interrater reliability score from US ( $\kappa=0.839$ )  
38 (73); school audit tools used in the IDEA study in the US (74); and the Australian HPS school  
39 audit (72). The tool includes whole school strategies relevant to promoting good nutrition and  
40 physical activity.  
41  
42  
43  
44  
45  
46  
47  
48

## 49 **Data Analysis**

### 50 **Phase Two: Survey Analysis:**

#### 51 ***Survey development (validity and reliability testing)***

52  
53  
54  
55 Validity and reliability during the survey development and the cross-sectional survey will be  
56 examined using different types of factor analysis as details are detailed below (Figure 2).  
57  
58  
59  
60

### ***Explanatory factor Analysis***

The initial construct validity of the instrument will be established through exploratory factor analysis (EFA), allowing the transformation of correlations among a set of observed variables into each of the six proposed subscales of overweight and obesity (75). EFA will be used to extract factors with eigenvalues  $> 1$ , which will then be rotated to identify subscales or factors that best fit the instrument (76) and decisions will be made if the items need to be excluded which is testing the initial construct validity of the instrument. The assumptions should be met where the number of participants is sufficient as literature states that three to 20 people per variable is sufficient to run this EFA analysis (77), the Kaiser-Mayer-Olkin (KMO) ( $>0.50$ ) and Bartlett's test of sphericity ( $P < 0.05$ ). For the sample size of 120 students, the sufficient factor loading is above 0.50 (78).

### ***Internal consistency***

Once the factors are extracted using the EFA, internal consistency of each factor within the instrument and its items will be measured using Cronbach's alpha, an alpha greater than or equal to 0.7 will be considered adequate (79).

### ***Test-retest reliability***

The scores and mean scores obtained during the two surveys will be calculated with the Pearson product-moment correlation analysis. Spearman's rho, a measure of agreement between scores on different administrations of the instrument will be calculated and the correlation coefficient between 0.7 and 1.0 indicate that the instrument is reliable or shows consistency across time (80,81).

## **Phase Three: Mixed Methods Study**

### ***(a) Cross-sectional and BMI measurements***

#### ***Confirmatory factor analysis***

In this phase, the construct validity will be assessed using confirmatory factor analysis (CFA). For confirmatory content analysis and explanatory analysis more than 500 or 10 samples per item are sufficient (82). In our study, the sample size calculated is 1200 which is sufficient to undergo confirmatory factor analysis. This construct validity using CFA will indicate whether the subscales of overweight and obesity identified in phase two are valid and is achieved when the fitness indexes is achieved to the required level: Chi-square  $\chi^2$  ( $p$ -value  $> 0.05$ ), Chi-Square/

1  
2  
3 df < 3.0, Root Mean Square Error of Approximation (RMSEA) < 0.08), Goodness-of-Fit Index  
4 (GFI) > 0.90 comparative fit index (CFI) > 0.90 Normed Fit Index > 0.90 (83). The second  
5 stage of EFA analysis at this phase is to identify and estimate whether it fits the model and the  
6 degrees of freedom as well. The CFA will be analysed using a powerful structural equation  
7 modelling software IBM SPSS Amos. Finally, the model will be rearranged revised to improve  
8 the fit as indicated and Akaike Information Criterion (AIC) will be used to compare between  
9 model during the fitting process (84).

### 16 *Descriptive data analysis*

17  
18 During data entry, exploratory data analysis will be conducted to identify outliers, missing data,  
19 describe and check the assumption of normality and distribution of continuous data using  
20 histogram and Kolmogorov-Smirnov test and Shapiro-Wilk test (85). The central tendencies  
21 will be expressed in mean, median, standard deviations and interquartile range for continuous  
22 data while frequencies and percentages will be used to express data for categorical variables.  
23 Chi-square tests ( $\chi^2$ ) will assess the associations between each independent variable and  
24 overweight and obesity.

### 31 *Inferential data analysis*

32  
33 Initially, all variables will be analysed univariately and those with p-value more than 0.25 will  
34 be included in the model to avoid the possibility of residual cofounders (57). Logistic  
35 regression will be employed to analyse the predictors of obesity and overweight (BMI  
36 measurements). The significance level will be set at  $P < 0.05$  at 95% confidence interval (CI).  
37 Data analysis will be carried out using the Statistical Package for Social Sciences (SPSS)  
38 software version 26.0.

### 45 **(b) Interview with school principals and sport teachers**

46  
47 Content analysis will explore perceptions and experiences, generating rich and in-depth  
48 information on the underlying studied phenomena (86). Themes will be identified, and  
49 responses coded to elicit shared meanings of perceptions across interviews and to guide the  
50 researchers in reporting the results. For this purpose, directed thematic analysis approach will  
51 be employed (87). Common themes and subthemes will be identified based on the interview  
52 responses (88). The qualitative data will be managed using software package NVivo 12. When  
53  
54  
55  
56  
57  
58  
59  
60



1  
2  
3 the interview is transcribed, it will be sent back to a sample of consenting participants for  
4 verification.  
5

### 6 7 **(c) School Climate Audit** 8

9  
10 The school climate audit will be reviewed by health promotion and education experts from  
11 Australia and KSA to determine face and content validity. The tool will be tested with two  
12 teachers from the two Intermediate Schools in Jeddah conducting the student survey test-retest.  
13 The audit responses will be classified as “implemented”, “partially implemented” and “not  
14 implemented” and will be tabulated and evaluated section by section.  
15  
16  
17  
18

### 19 **Patient and public involvement** 20

21 No patient or public involved.  
22

### 23 **Ethics and dissemination** 24

25  
26 Ethical approval has been granted through Curtin University’s Human Research Ethics  
27 Committee (HRE2020-0337) and from the KSA Ministry of Education (4181827686). Initially  
28 consent will be obtained from the principals of each school involved to allow their school to  
29 participate in the study. Individual consent will be sought from teachers, principal/deputy and  
30 parents and assent sought from students. Participant information sheets will be provided for the  
31 principal describing the school’s involvement. All participants (teachers, principals/deputies,  
32 students) and parents will be provided individual participant information sheets describing the  
33 study and highlighting the voluntary nature of the study.  
34  
35  
36  
37  
38  
39  
40

41 All information collected from participating schools, principals, teachers and students will be  
42 de-identified. Students completing the survey will be assigned an identification (ID)  
43 number/code stipulated in the survey prior to data collection so that their BMI can be linked to  
44 their survey responses. If surveys are conducted on paper they will be scanned, and originals  
45 stored securely until appropriately disposed. All electronic data will be stored on a secure  
46 password protected network which can only be accessed by the researchers. Data will be  
47 appropriately disposed of after a minimum of seven years after project completion or until the  
48 participant has reached 25 years of age (89). Results will be presented as aggregate and there  
49 will be no identification of individuals.  
50  
51  
52  
53  
54  
55  
56

57 This study provides a unique opportunity to inform school-based interventions in KSA.  
58 Recommendations will be made to the KSA Ministry of Education regarding the  
59  
60

1  
2  
3 implementation of whole school interventions. Findings will be used to advocate for school-  
4 based curriculum and policy change at a National level. The tools developed, and the learnings  
5 from the study will be made available to individual schools to support school-based planning.  
6 Findings will be published as a doctoral thesis, in peer review publications and at conferences.  
7  
8 In addition, key findings will be shared with the KSA Ministry of Education, participating  
9 schools and to the broader school community through newsletters.  
10  
11  
12  
13

14 **Contributors** All authors contributed significantly to the conceptualisation, design and  
15 drafting of this protocol. NA, conceived the study which was developed with guidance and  
16 support from SB and LP. NA drafted the paper which was critically reviewed and edited by SB  
17 and LP. All authors approved the final version of the manuscript.  
18  
19  
20  
21

22 **Funding statement** This research project is funded by Royal Embassy of Saudi Arabia in  
23 Australia (Award/Grant number is not applicable) and administered through the doctoral  
24 programme run at Curtin University's School of Public Health.  
25  
26  
27

28 **Competing interests** none declared  
29

30 **Ethics approval** Ethics approval has been obtained from Curtin University (**HRE2020-0337**),  
31 and from the KSA Ministry of Education (4181827686).  
32  
33

34 **Patient consent for publication** Not required.  
35

36 **Provenance and peer review** Not commissioned; externally peer reviewed.  
37  
38

39 **Open access** This is an open access article distributed in accordance with the Creative  
40 Commons Attribution Non Commercial (CC BY-NC4.0) license, which permits others to  
41 distribute, remix, adapt, build upon this work non-commercially, and license their derivative  
42 works on different terms, provided the original work is properly cited, appropriate credit is  
43 given, any changes made indicated, and the use is non-commercial. See: [http://](http://creativecommons.org/licenses/by-nc/4.0/)  
44 [creativecommons.org/licenses/by-nc/4.0/](http://creativecommons.org/licenses/by-nc/4.0/).  
45  
46  
47  
48  
49

#### 50 **ORCID iDs**

51  
52 Naif Almutairi [0000-0002-7330-7244](https://orcid.org/0000-0002-7330-7244)

53 Sharyn Burns [0000-0002-1551-2805](https://orcid.org/0000-0002-1551-2805)

54 Linda Portsmouth [0000-0002-9803-8546](https://orcid.org/0000-0002-9803-8546)  
55  
56  
57  
58  
59  
60

1  
2  
3 ***Figure 1. Conceptual framework using Socio-ecological Model to inform the study design***  
4

5  
6 **Setting**  
7  
8  
9

10 ***Figure 2: Processes and analysis of survey development and mixed methodology***  
11

12 ***Instrumentation***  
13  
14  
15  
16  
17  
18  
19  
20  
21  
22  
23  
24  
25  
26  
27  
28  
29  
30  
31  
32  
33  
34  
35  
36  
37  
38  
39  
40  
41  
42  
43  
44  
45  
46  
47  
48  
49  
50  
51  
52  
53  
54  
55  
56  
57  
58  
59  
60

For peer review only

## Reference

1. WHO. Global Health Observatory (GHO) data- Overweight and obesity -Prevalence of obesity among children and adolescents [Internet]. 2018 [cited 2019 Dec 11]. Available from: [https://www.who.int/gho/ncd/risk\\_factors/overweight\\_obesity/obesity\\_adolescents/en/](https://www.who.int/gho/ncd/risk_factors/overweight_obesity/obesity_adolescents/en/)
2. Bentham J, Di Cesare M, Bilano V, Bixby H, Zhou B, Stevens GA, et al. Worldwide trends in body-mass index, underweight, overweight, and obesity from 1975 to 2016: a pooled analysis of 2416 population-based measurement studies in 128·9 million children, adolescents, and adults. *Lancet*. 2017 Dec 16;390(10113):2627–42.
3. Sutaria S, Devakumar D, Yasuda SS, Das S, Saxena S. Is obesity associated with depression in children? Systematic review and meta-analysis. *Arch Dis Child*. 2019 Jan 1;104(1):64–74.
4. Nemiary D, Shim R, Mattox G, Holden K. The relationship between obesity and depression among adolescents. *Psychiatr Ann*. 2012;42(8):305–8.
5. Danielsen YS, Stormark KM, Nordhus IH, Mæhle M, Sand L, Ekornås B, et al. Factors associated with low self-esteem in children with overweight. *Obes Facts*. 2012 Nov;5(5):722–33.
6. Bechard LJ, Rothpletz-Puglia P, Touger-Decker R, Duggan C, Mehta NM. Influence of obesity on clinical outcomes in hospitalized children. Vol. 167, *JAMA Pediatrics*. 2013. p. 476–82.
7. WHO. Obesity: Preventing and managing the global epidemic. World Health Organization: Technical Report Series [Internet]. WHO Technical Report Series, no. 894. 2000 [cited 2019 Dec 11]. p. 252. Available from: [https://www.who.int/nutrition/publications/obesity/WHO\\_TRS\\_894/en/](https://www.who.int/nutrition/publications/obesity/WHO_TRS_894/en/)
8. Fang X, Zuo J, Zhou J, Cai J, Chen C, Xiang E, et al. Childhood obesity leads to adult

- 1  
2  
3 type 2 diabetes and coronary artery diseases. *Medicine (Baltimore)* [Internet]. 2019 Aug  
4 [cited 2019 Dec 11];98(32):e16825. Available from:  
5 <http://insights.ovid.com/crossref?an=00005792-201908090-00076>  
6  
7  
8  
9 9. Brady TM. Obesity-related hypertension in children. Vol. 5, *Frontiers in Pediatrics*.  
10 *Frontiers Media S.A.*; 2017.  
11  
12  
13 10. Onyemaechi NOC, Anyanwu GE, Obikili EN, Onwuasoigwe O, Nwankwo OE. Impact  
14 of overweight and obesity on the musculoskeletal system using lumbosacral angles.  
15 *Patient Prefer Adherence* [Internet]. 2016 Mar 10 [cited 2020 Aug 18];10:291–6.  
16 Available from: [/pmc/articles/PMC4792212/?report=abstract](https://pubmed.ncbi.nlm.nih.gov/26711212/)  
17  
18  
19  
20  
21 11. Carbone S, Canada JM, Billingsley HE, Siddiqui MS, Elagizi A, Lavie CJ. Obesity  
22 paradox in cardiovascular disease: Where do we stand? [Internet]. Vol. 15, *Vascular*  
23 *Health and Risk Management*. Dove Medical Press Ltd.; 2019 [cited 2020 Aug 18]. p.  
24 89–100. Available from: [/pmc/articles/PMC6503652/?report=abstract](https://pubmed.ncbi.nlm.nih.gov/32111212/)  
25  
26  
27  
28  
29 12. Buttitta M, Iliescu C, Rousseau A, Guerrien A. Quality of life in overweight and obese  
30 children and adolescents: a literature review. Vol. 23, *Quality of life research : an*  
31 *international journal of quality of life aspects of treatment, care and rehabilitation*. 2014.  
32 p. 1117–39.  
33  
34  
35  
36 13. Krukowski RA, Smith West D, Philyaw Perez A, Bursac Z, Phillips MM, Raczynski  
37 JM. Overweight children, weight-based teasing and academic performance. *Int J Pediatr*  
38 *Obes*. 2009;4(4):274–80.  
39  
40  
41  
42 14. Gunnell DJ, Frankel SJ, Nanchahal K, Peters TJ, Davey Smith G. Childhood obesity  
43 and adult cardiovascular mortality: a 57-y follow-up study based on the Boyd Orr cohort.  
44 *Am J Clin Nutr* [Internet]. 1998 Jun 1 [cited 2019 Dec 11];67(6):1111–8. Available  
45 from: <https://academic.oup.com/ajcn/article/67/6/1111-1118/4666016>  
46  
47  
48  
49 15. Franks PW, Hanson RL, Knowler WC, Sievers ML, Bennett PH, Looker HC. Childhood  
50 Obesity, Other Cardiovascular Risk Factors, and Premature Death. *N Engl J Med*  
51 [Internet]. 2010 Feb 11 [cited 2019 Dec 11];362(6):485–93. Available from:  
52 <http://www.nejm.org/doi/abs/10.1056/NEJMoa0904130>  
53  
54  
55  
56  
57 16. Sonntag D. Why Early Prevention of Childhood Obesity Is More Than a Medical  
58 Concern: A Health Economic Approach. *Ann Nutr Metab* [Internet]. 2017 [cited 2019  
59  
60

- 1  
2  
3 Dec 11];70(3):175–8. Available from:  
4 <https://www.karger.com/Article/FullText/456554>  
5  
6  
7  
8 17. Sonntag D, Ali S, De Bock F. Lifetime indirect cost of childhood overweight and  
9 obesity: A decision analytic model. *Obesity*. 2016 Jan 1;24(1):200–6.  
10  
11 18. Sonntag D, Ali S, Lehnert T, Konnopka A, Riedel-Heller S, König HH. Estimating the  
12 lifetime cost of childhood obesity in Germany: Results of a Markov Model. *Pediatr*  
13 *Obes*. 2015 Dec 1;10(6):416–22.  
14  
15  
16  
17 19. Musaiger AO, Hassan AS, Obeid O. The paradox of nutrition-related diseases in the  
18 Arab countries: The need for action. Vol. 8, *International Journal of Environmental*  
19 *Research and Public Health*. 2011. p. 3637–71.  
20  
21  
22  
23 20. Yusuf S, Hawken S, Ôunpuu S, Bautista L, Franzosi MG, Commerford P, et al. Obesity  
24 and the risk of myocardial infarction in 27 000 participants from 52 countries: A case-  
25 control study. *Lancet*. 2005 Nov 5;366(9497):1640–9.  
26  
27  
28  
29 21. Musaiger AO, Al-Mannai M, Al-Lalla O, Saghir S, I.Halahleh, Benhamed MM, et al.  
30 Obesity among adolescents in five Arab countries; relative to gender and age. *Nutr Hosp*.  
31 2013;28(6).  
32  
33  
34  
35 22. Sultan ALNohair. Obesity in gulf countries. *Int J Health Sci (Qassim)* [Internet].  
36 2014;8(1):79–83. Available from:  
37 [http://www.pubmedcentral.nih.gov/articlerender.fcgi?artid=4039587&tool=pmcentrez](http://www.pubmedcentral.nih.gov/articlerender.fcgi?artid=4039587&tool=pmcentrez&rendertype=abstract)  
38 &rendertype=abstract  
39  
40  
41  
42 23. Al-Muhaimeed AA, Dandash K, Ismail MS, Saquib N. Prevalence and correlates of  
43 overweight status among Saudi school children. *Ann Saudi Med*. 2015 Jul 1;35(4):275–  
44 81.  
45  
46  
47  
48 24. Al-Ghamdi S, Shubair MM, Aldiab A, Al-Zahrani JM, Aldossari KK, Househ M, et al.  
49 Prevalence of overweight and obesity based on the body mass index; A cross-sectional  
50 study in Alkharj, Saudi Arabia. *Lipids Health Dis*. 2018 Jun 5;17(1).  
51  
52  
53  
54 25. El Mouzan MI, Foster PJ, Al Herbish AS, Al Salloum AA, Al Omer AA, Qurachi MM,  
55 et al. Prevalence of overweight and obesity in Saudi children and adolescents. *Ann Saudi*  
56 *Med*. 2010;30(3):203–8.  
57  
58  
59  
60 26. Al-Hussaini A, Bashir M, Khormi M, AlTuraiki M, Alkhamis W, Alrajhi M, et al.

- 1  
2  
3 Overweight and obesity among Saudi children and adolescents: Where do we stand  
4 today? Saudi J Gastroenterol [Internet]. 2019 [cited 2019 Dec 11];25(4):229. Available  
5 from: <http://www.saudijgastro.com/text.asp?2019/25/4/229/259848>  
6  
7  
8
- 9 27. Moalla N, Al Moraie D. Dietary Patterns in Saudi Arabian Adults Residing in Different  
10 Geographical Locations in Saudi Arabia and in the UK in Relation to Heart Disease  
11 Risk. Newcastle University; 2014.  
12  
13
- 14 28. Aljoudi A, Mwanri L, Al Dhaifallah A. Childhood obesity in Saudi Arabia:  
15 Opportunities and challenges. Saudi J Obes. 2015;3(1):2.  
16  
17
- 18 29. Musaiger AO. Overweight and Obesity in EasternMediterranean Region: Prevalence  
19 and Possible Causes. J Obes. 2011;2011(January 1990):1–17.  
20  
21  
22
- 23 30. Sahoo K, Sahoo B, Choudhury AK, Sofi NY, Kumar R, Bhadoria AS. Childhood  
24 obesity: Causes and consequences. J Fam Med Prim care. 2015;4(2):187–92.  
25  
26
- 27 31. Musaiger AO, Al Hazzaa HM, Al-Qahtani A, Elati J, Ramadan J, AboulElla NA, et al.  
28 Strategy to combat obesity and to promote physical activity in Arab countries. Diabetes,  
29 Metab Syndr Obes Targets Ther. 2011;4:89–97.  
30  
31  
32
- 33 32. Chen Y, Ma L, Ma Y, Wang H, Luo J, Zhang X, et al. A national school-based health  
34 lifestyles interventions among Chinese children and adolescents against obesity:  
35 Rationale, design and methodology of a randomized controlled trial in China. BMC  
36 Public Health. 2015;15(1):1–10.  
37  
38  
39
- 40 33. Langford R, Bonell C, Jones H, Pouliou T, Murphy S, Waters E, et al. The World Health  
41 Organization’s Health Promoting Schools framework: A Cochrane systematic review  
42 and meta-analysis. BMC Public Health. 2015;15(1):1–15.  
43  
44  
45
- 46 34. Bennett L, Burns S. Implementing health-promoting schools to prevent obesity. Health  
47 Educ [Internet]. 2020 [cited 2020 Jul 27];120(2). Available from:  
48 <https://www.emerald.com/insight/0965-4283.htm>  
49  
50  
51
- 52 35. Al-Hazzaa HM. Prevalence and trends in obesity among school boys in Central Saudi  
53 Arabia between 1988 and 2005. Saudi Med J. 2007;28(10):1569–74.  
54  
55
- 56 36. Al-Hazzaa HM, Al-Sobayel HI, Abahussain NA, Qahwaji DM, Alahmadi MA,  
57 Musaiger AO. Association of dietary habits with levels of physical activity and screen  
58 time among adolescents living in Saudi Arabia. J Hum Nutr Diet.  
59  
60

- 2014;27(SUPPL2):204–13.
37. Schoon M, Leeuw S Van Der. The shift toward social-ecological systems perspectives : insights into the human-nature relationship. *Natures Sci Sociétés*. 2015;23(2):166–74.
  38. Bronfenbrenner U. *Ecology of Human Development: Experiments by Nature and Design*. Cambridge, MA: Harvard University Press.; 1979.
  39. Kumanyika SK, Obarzanek E, Stettler N, Bell R, Field AE, Fortmann SP, et al. Population-based prevention of obesity: The need for comprehensive promotion of healthful eating, physical activity, and energy balance: A scientific statement from American Heart Association Council on Epidemiology and Prevention, Interdisciplinary Commi. *Circulation*. 2008;118(4):428–64.
  40. McLeroy KR, Bibeau D, Steckler A, Glanz K. An Ecological Perspective on Health Promotion Programs. *Heal Educ & Behaviour*. 1988;15(4):351–77.
  41. WHO. Regional guidelines: development of health-promoting schools - a framework for action [Internet]. 1996. Available from: <http://iris.wpro.who.int/handle/10665.1/1435>
  42. Richard L, Gauvin L, Raine K. Ecological Models Revisited: Their Uses and Evolution in Health Promotion Over Two Decades. *Annu Rev Public Health* [Internet]. 2011 Apr 21 [cited 2019 Dec 22];32(1):307–26. Available from: <http://www.annualreviews.org/doi/10.1146/annurev-publhealth-031210-101141>
  43. McLaren L, Hawe P. Ecological perspectives in health research. *J Epidemiol Community Health*. 2005;59(1):6–14.
  44. Townsend N, Foster C. Developing and applying a socio-ecological model to the promotion of healthy eating in the school. *Public Health Nutr*. 2013;16(6):1101–8.
  45. Golden SD, Earp JAL. Social Ecological Approaches to Individuals and Their Contexts: Twenty Years of Health Education & Behavior Health Promotion Interventions. *Heal Educ Behav*. 2012;39(3):364–72.
  46. Wiseman AW, Sadaawi A, Alromi NH. Educational Indicators and National Development in Saudi Arabia. In: Paper presented at the 3rd IEA International Research Conference 18-20 September 2008 – Taipei City, Taiwan. 2008.
  47. Higgins JPT, Sterne JAC, Savović J, Page MJ, Hróbjartsson A, Boutron I, Reeves B ES.



- 1  
2  
3 A revised tool for assessing risk of bias in randomized trials. *Cochrane Database Syst*  
4 *Rev* [Internet]. 2016;10(2016):1–4. Available from:  
5 <http://www.nccmt.ca/resources/search/280>.  
6  
7  
8
- 9 48. Moher D, Liberati A, Tetzlaff J, Altman DG. Preferred Reporting Items for Systematic  
10 *Reviews and Meta-Analyses : The PRISMA Statement.* *PLoS Med.*  
11 2009;6(7):e1000097.  
12  
13
- 14 49. Cecchetto FH, Pellanda LC. Construction and validation of a questionnaire on the  
15 *knowledge of healthy habits and risk factors for cardiovascular disease in*  
16 *schoolchildren.* *J Pediatr* [Internet]. 2014;90(4):415–9. Available from:  
17 [http://www.scielo.br/scielo.php?script=sci\\_arttext&pid=S0021-75572014000400415](http://www.scielo.br/scielo.php?script=sci_arttext&pid=S0021-75572014000400415)  
18  
19
- 20 50. Shah A, Aishath, Oran A, Farhana H, Azreena, M FD, et al. Knowledge, Attitude and  
21 *Practice Regarding Healthy Diet and Physical Activity Among Overweight or Obese*  
22 *Children.* *Int J Public Heal Clin Sci.* 2018;5(4).  
23  
24
- 25 51. Bajinka O, Badjan M. Assessing The Awareness, Attitude and Practice of Students in  
26 *The Public Health and Education Department, University of The Gambia.* *Acta Sci Med*  
27 *Sci.* 2019;3(3):52–62.  
28  
29
- 30 52. Klakk H, Wester CT, Olesen LG, Rasmussen MG, Kristensen PL, Pedersen J, et al. The  
31 *development of a questionnaire to assess leisure time screen-based media use and its*  
32 *proximal correlates in children (SCREENS-Q).* *BMC Public Health* [Internet]. 2020  
33 *May 12 [cited 2020 Aug 3];20(1).* Available from:  
34 <https://pubmed.ncbi.nlm.nih.gov/32397984/>  
35  
36
- 37 53. Australian Bureau of Statistics 2011/12. *Australia’s Physical Activity and Sedentary*  
38 *Behaviour Guidelines and the Australian 24-Hour Movement Guidelines* [Internet].  
39 *Australian Government Department of Health; 2013 [cited 2020 Aug 3].* Available from:  
40 [https://www.abs.gov.au/AUSSTATS/abs@.nsf/DetailsPage/4364.0.55.0042011-](https://www.abs.gov.au/AUSSTATS/abs@.nsf/DetailsPage/4364.0.55.0042011-12?OpenDocument)  
41 [12?OpenDocument](https://www.abs.gov.au/AUSSTATS/abs@.nsf/DetailsPage/4364.0.55.0042011-12?OpenDocument)  
42  
43
- 44 54. Whati L, Senekal M, Steyn N, Nel J, Lombard C, Norris S. Development of a reliable  
45 *and valid nutritional knowledge questionnaire for urban South African adolescents.*  
46 *Nutrition.* 2005;21(1):76-85  
47  
48
- 49 55. Frobisher C, Maxwell SM. The attitudes and nutritional knowledge of a group of 11-12  
50  
51  
52  
53  
54  
55  
56  
57  
58  
59  
60

- 1  
2  
3 year olds in Merseyside. *Int J Heal Promot Educ* [Internet]. 2001 [cited 2020 Aug  
4 3];39(4):121–7. Available from:  
5 <https://www.tandfonline.com/doi/abs/10.1080/14635240.2001.10806187>  
6  
7  
8
- 9 56. NSW Health. School Students Behaviour Survey: HealthStats NSW. 2016;1–24.  
10 Available from: [https://www.health.nsw.gov.au/surveys/student/Documents/student-](https://www.health.nsw.gov.au/surveys/student/Documents/student-health-survey-2017-quest.pdf)  
11 [health-survey-2017-quest.pdf](https://www.health.nsw.gov.au/surveys/student/Documents/student-health-survey-2017-quest.pdf)  
12  
13
- 14 57. Lemeshow S, Hosmer DW, Klar J, Lwanga SK. Adequacy of Sample Size in Health  
15 Studies [Internet]. WHO. New York,USA: JOHN WILEY &SONS,INC; 1990. 68–70  
16 p. Available from: <https://doi.org/10.1186/1472-6963-14-335>  
17  
18  
19
- 20 58. Shackman G. Sample size and design effect. Retrieved from [Internet]. Chapter of  
21 American Statistical Association. NYS DOH; 2001. Available from:  
22 <http://faculty.smu.edu/slstokes/stat6380/deff doc.pdf>  
23  
24  
25
- 26 59. Stewart A, Marfell-Jones M, Olds T, Ridder H de. International standards for  
27 anthropometric assessment. Edition 2011, editor. International Society for the  
28 Advancement of Kinanthropometry. Routledge; 2011. 264 p.  
29  
30  
31
- 32 60. Yorkin M, Spaccarotella K, Martin-Biggers J, Quick V, Byrd-Bredbenner C. Accuracy  
33 and consistency of weights provided by home bathroom scales. *BMC Public Health*.  
34 2013;13(1):1–5.  
35  
36  
37
- 38 61. Himes JH. Challenges of accurately measuring and using BMI and other indicators of  
39 obesity in children. Vol. 124, *Pediatrics*. 2009.  
40  
41  
42
- 43 62. Howard-Drake EJ, Halliday V. Exploring primary school headteachers' perspectives on  
44 the barriers and facilitators of preventing childhood obesity. *J Public Health (Bangkok)*.  
45 2016;38(1):44–52.  
46  
47  
48
- 49 63. Schuler BR, Saksvig BI, Nduka J, Beckerman S, Jaspers L, Black MM, et al. Barriers  
50 and Enablers to the Implementation of School Wellness Policies: An Economic  
51 Perspective. *Health Promot Pract*. 2018;19(6):873–83.  
52  
53  
54
- 55 64. Clarke J, Fletcher B, Lancashire E, Pallan M, Adab P. The views of stakeholders on the  
56 role of the primary school in preventing childhood obesity: A qualitative systematic  
57 review. Vol. 14, *Obesity Reviews*. 2013. p. 975–88.  
58  
59  
60
65. Della Torre Swiss SB, Akre C, Suris JC. Obesity prevention opinions of school

- 1  
2  
3 stakeholders: A Qualitative Study. *J Sch Health*. 2010 May;80(5):233–9.  
4  
5  
6 66. Patino-Fernandez AM, Hernandez J, Villa M, Delamater A. School-based health  
7 promotion intervention: Parent and school staff perspectives. *J Sch Health*. 2013  
8 Nov;83(11):763–70.  
9  
10  
11 67. Schetzina KE, Dalton WT, Lowe EF, Azzazy N, Vonwerssowetz KM, Givens C, et al.  
12 Developing a coordinated school health approach to child obesity prevention in rural  
13 Appalachia: results of focus groups with teachers, parents, and students. *Rural Remote*  
14 *Health* [Internet]. 2009 [cited 2019 Dec 10];9(4):1157. Available from:  
15 <http://www.ncbi.nlm.nih.gov/pubmed/19877760>  
16  
17  
18  
19  
20  
21 68. Sutton J, Austin Z. *Qualitative Research : Data Collection , Analysis , and Management*.  
22 *Can J Hosp Pharm*. 2015;68(3):226–31.  
23  
24  
25 69. Langford R, Bonell C, Jones H, Campbell R. Obesity prevention and the Health  
26 promoting Schools framework: essential components and barriers to success. *Int J Behav*  
27 *Nutr Phys Act* [Internet]. 2015 Dec 13 [cited 2019 Nov 15];12(1):15. Available from:  
28 <https://ijbnpa.biomedcentral.com/articles/10.1186/s12966-015-0167-7>  
29  
30  
31  
32 70. Broyles ST, Drazba KT, Church TS, Chaput J-P, Fogelholm M, Hu G, et al.  
33 Development and reliability of an audit tool to assess the school physical activity  
34 environment across 12 countries. *Int J Obes Suppl*. 2015 Dec;5(S2):S36–42.  
35  
36  
37  
38 71. Champagne CM, Chaput J-P, Tudor-Locke C, Hu G, Barreira T V, Church TS, et al.  
39 The International Study of Childhood Obesity, Lifestyle and the Environment  
40 (ISCOLE): design and methods. *BMC Public Health*. 2013;13(1).  
41  
42  
43  
44 72. WAHPSA. Health Promoting Schools Framework [Internet]. 2014 [cited 2019 May 30].  
45 p. 1–5. Available from: <http://www.hpb.gov.sg/HOPPortal/programmes-article/3128>  
46  
47  
48 73. Lee C, Kim HJ, Dowdy DM, Hoelscher DM, Ory MG. TCOPPE School Environmental  
49 Audit Tool: Assessing Safety and Walkability of School Environments. *J Phys Act Heal*  
50 [Internet]. 2013 [cited 2019 Oct 22];10:949–60. Available from: [www.JPAH-](http://www.JPAH-Journal.com)  
51 [Journal.com](http://www.JPAH-Journal.com)  
52  
53  
54  
55 74. Lytle LA. Examining the etiology of childhood obesity: The IDEA study. *Am J*  
56 *Community Psychol*. 2009;44(3):338–49.  
57  
58  
59 75. Brown TA, Moore MT. Handbook of structural equation modeling. In: *Confirmatory*  
60

- Factor Analysis. New York, NY, US: The Guilford Press; 2012. p. 361–79.
76. Taherdoost H. Validity and Reliability of the Research Instrument; How to Test the Validation of a Questionnaire/Survey in a Research. *Int J Acad Res Manag.* 2016;5(3):28–36.
77. Mundfrom DJ, Shaw DG, Ke TL. Minimum Sample Size Recommendations for Conducting Factor Analyses. *Int J Test [Internet].* 2005 [cited 2019 Dec 6];5(2):159–68. Available from: <https://www.tandfonline.com/action/journalInformation?journalCode=hijt20>
78. Jr. JFH, Black WC, Babin BJ, Anderson RE. 3. Exploratory Factor Analysis. In: *Multivariate Data Analysis Hair Black Babin Anderson [Internet].* Seventh Ed. 2014 [cited 2019 Dec 6]. p. 89–150. Available from: [www.pearsoned.co.uk](http://www.pearsoned.co.uk)
79. Tavakol M, Dennick R. Making sense of Cronbach ' s alpha. *Int J Med Educ.* 2011;2:53–5.
80. Gliner JA, Morgan GA, Harmon RJ. Measurement reliability. *J Am Acad Child Adolesc Psychiatry [Internet].* 2001;40(4):486–8. Available from: <http://dx.doi.org/10.1097/00004583-200104000-00019>
81. Weiner J. *Measurement : Reliability and Validity Measures.* 2007;
82. Tabachnick BG, Fidell LS. *Using Multivariate Statistics [Internet].* 6th Editio. 2013. 128 p. Available from: <https://www.pearson.com/us/higher-education/program/Tabachnick-Using-Multivariate-Statistics-6th-Edition/PGM332849.html>
83. Zainuddin Awang. *VALIDATING THE MEASUREMENT MODEL: CFA.* In: *SEM Made Simple : a Gentle Approach to Learning Structural Equation Modeling.* MPWS Rich Publication; 2015.
84. Schermelleh-Engel K, Moosbrugger H, Müller H. Evaluating the Fit of Structural Equation Models: Tests of Significance and Descriptive Goodness-of-Fit Measures. Vol. 8, *Methods of Psychological Research Online.* 2003.
85. Andy Field. *Discovering Statistics Using IBM SPSS Statistics [Internet].* Fourth edi. London: SAGE Publications Inc.; 2013 [cited 2019 Dec 10]. Available from: <https://books.google.co.nz/books?hl=en&lr=&id=c0Wk9IuBmAoC&oi=fnd&pg=PP2&ots=LbGnGG->

- 1  
2  
3 u3H&sig=A6dblN8tUIo9xYdhoPn2z40aY3c&redir\_esc=y#v=onepage&q&f=false  
4  
5  
6 86. Lichtman M. *Qualitative Research in Education: A User's Guide*. second. California:  
7 sage; 2010.  
8  
9  
10 87. Braun V, Clarke V. Using thematic analysis in psychology. In: *Qualitative Research in*  
11 *Psychology*. 2006. p. 77–101.  
12  
13  
14 88. Vaismoradi M, Jones J, Turunen H, Snelgrove S. Theme development in qualitative  
15 content analysis and thematic analysis. *J Nurs Educ Pract*. 2016;6(5).  
16  
17  
18 89. Western Australian University Sector Disposal Authority. (2013.). Retrieved from  
19 [http://www.sro.wa.gov.au/sites/default/files/western\\_australian\\_university\\_sector\\_dis-](http://www.sro.wa.gov.au/sites/default/files/western_australian_university_sector_disposal_authority_sd2011011.pdf)  
20 [posal\\_authority\\_sd2011011.pdf](http://www.sro.wa.gov.au/sites/default/files/western_australian_university_sector_disposal_authority_sd2011011.pdf)  
21  
22  
23  
24  
25  
26  
27  
28  
29  
30  
31  
32  
33  
34  
35  
36  
37  
38  
39  
40  
41  
42  
43  
44  
45  
46  
47  
48  
49  
50  
51  
52  
53  
54  
55  
56  
57  
58  
59  
60

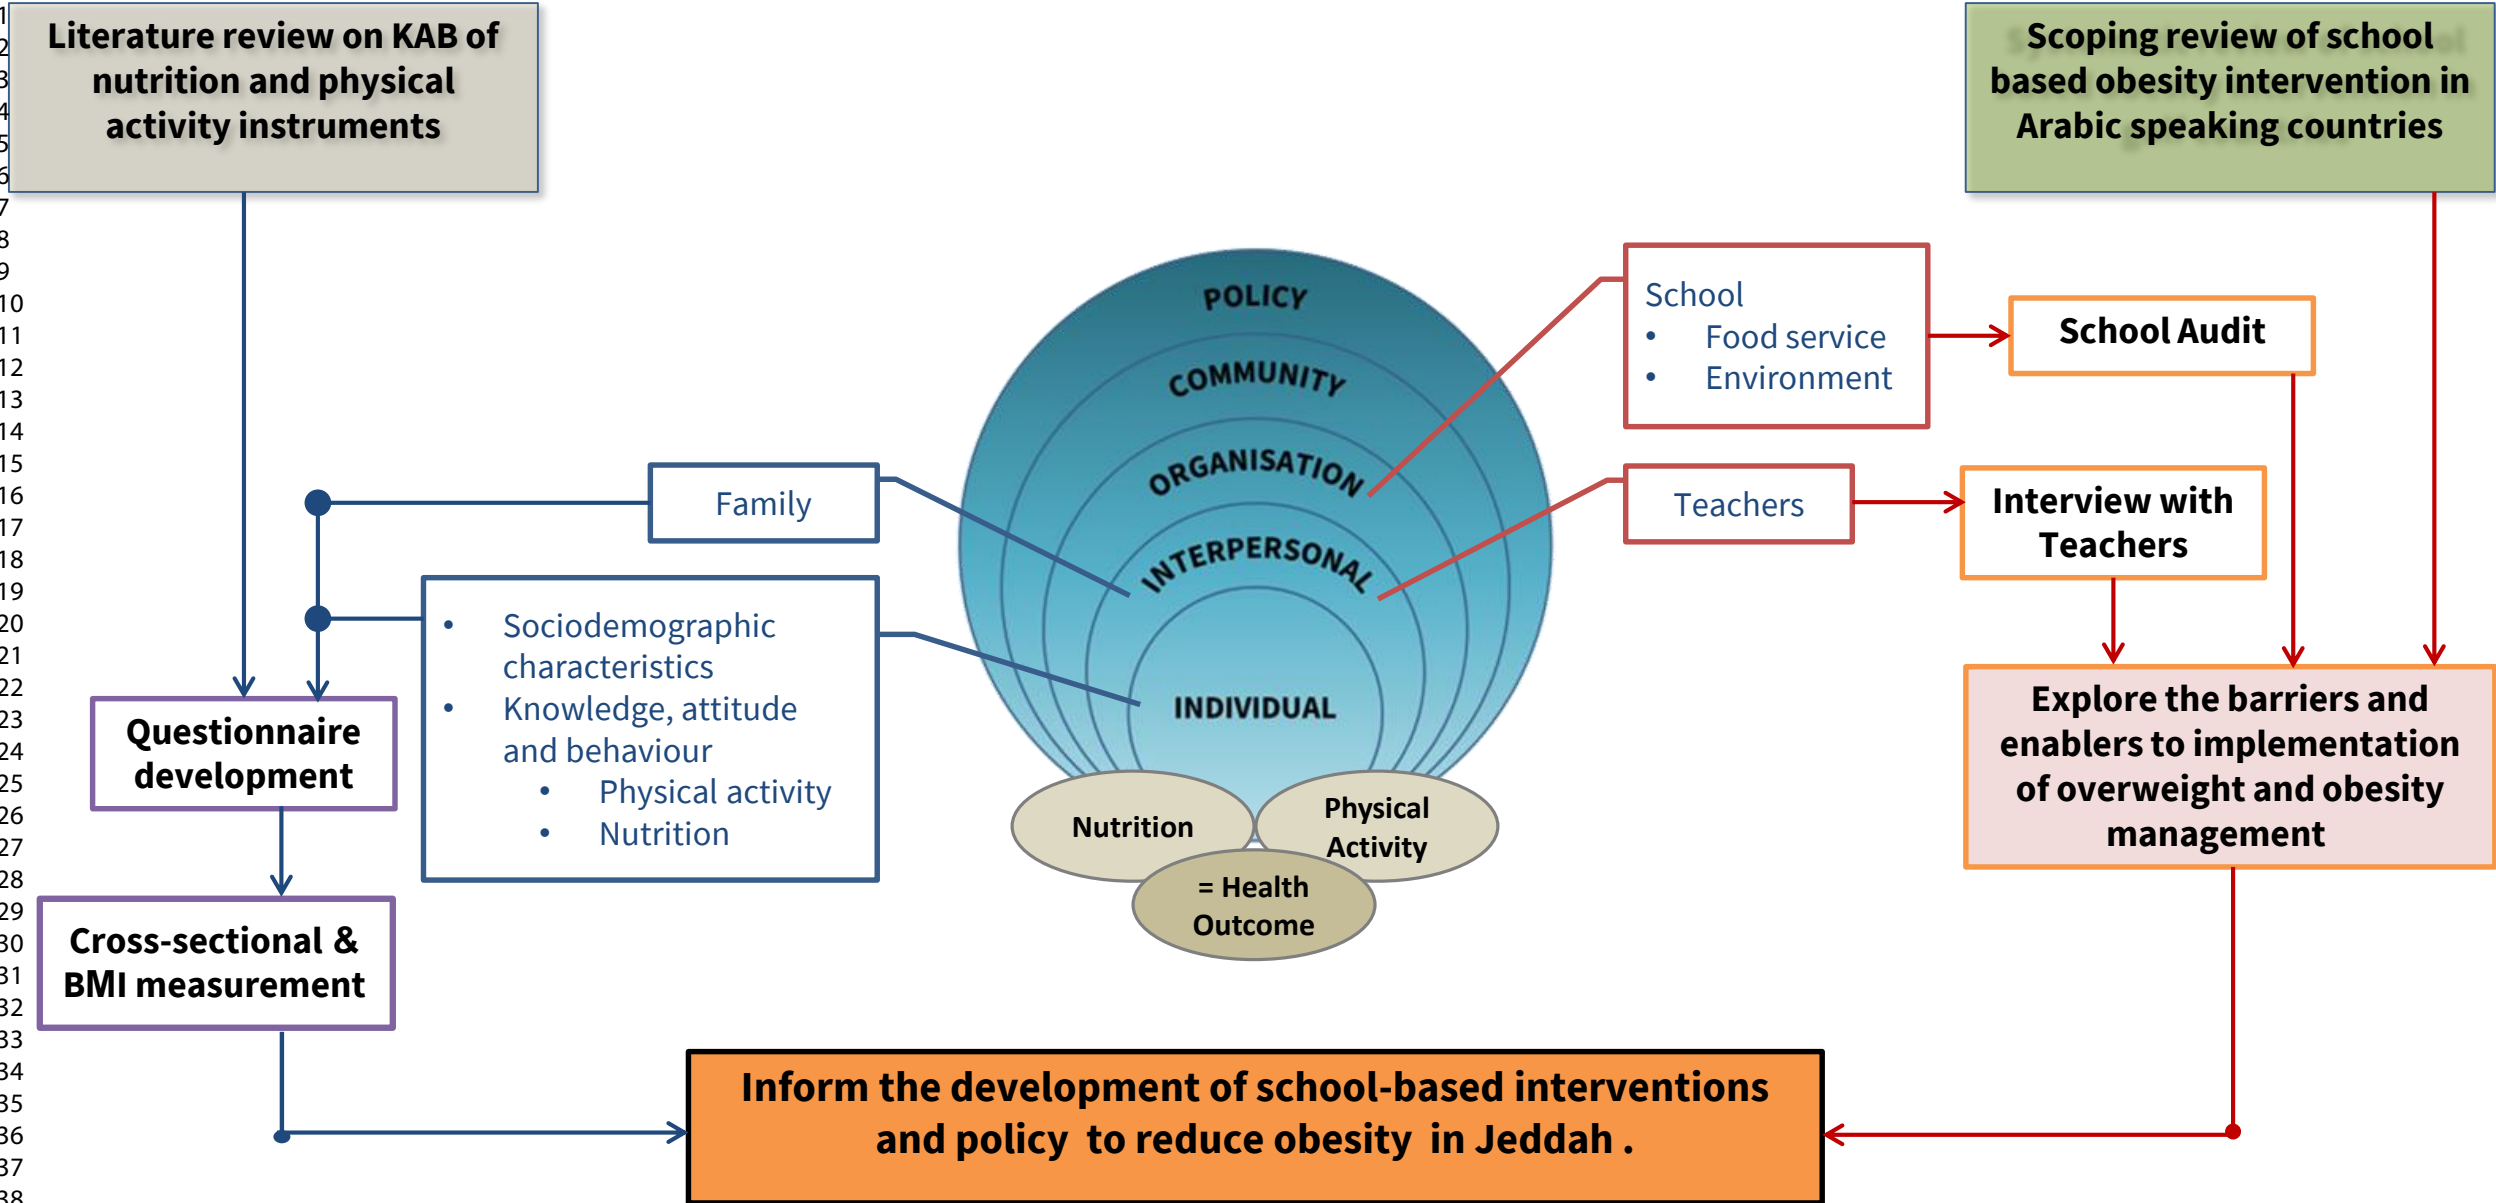

1  
2  
3  
4  
5  
6  
7  
8  
9  
10  
11  
12  
13  
14  
15  
16  
17  
18  
19  
20  
21  
22  
23  
24  
25  
26  
27  
28  
29  
30  
31  
32  
33  
34  
35  
36  
37  
38  
39  
40  
41

1  
2  
3  
4  
5  
6  
7  
8  
9  
10  
11  
12  
13  
14  
15  
16  
17  
18  
19  
20  
21  
22  
23  
24  
25  
26  
27  
28  
29  
30  
31  
32  
33  
34  
35  
36  
37  
38  
39  
40  
41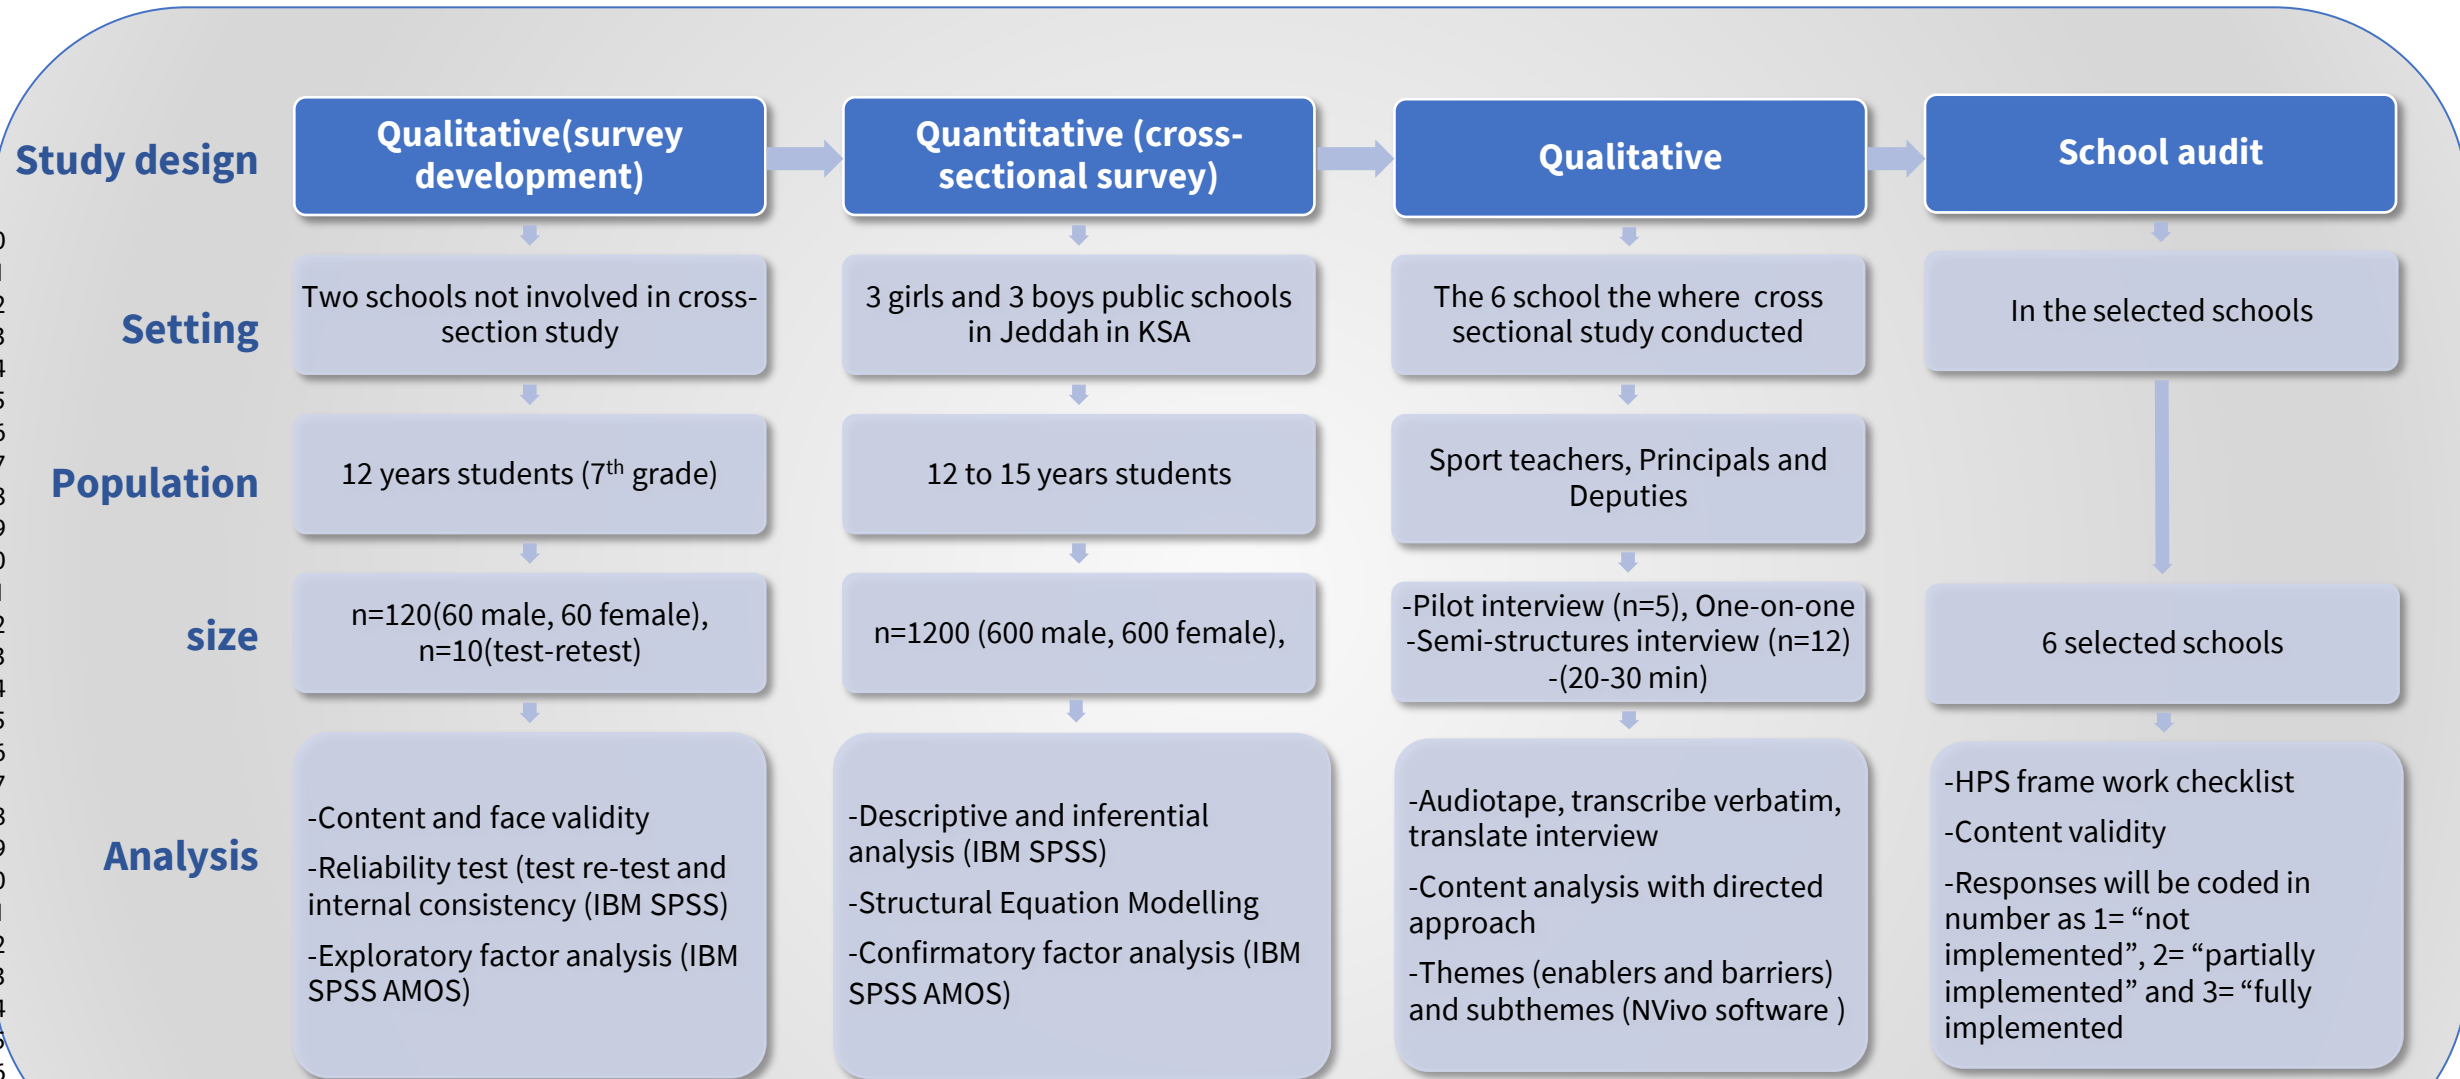

1  
2  
3  
4  
5  
6  
7  
8  
9  
10  
11  
12  
13  
14  
15  
16  
17  
18  
19  
20  
21  
22  
23  
24  
25  
26  
27  
28  
29  
30  
31  
32  
33  
34  
35  
36  
37  
38  
39  
40  
41

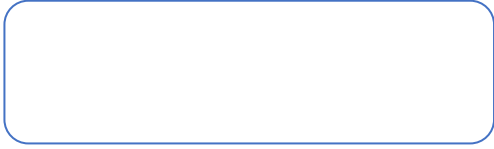



**STROBE 2007 (v4) Statement—Checklist of items that should be included in reports of *cross-sectional studies***

| Section/Topic                | Item # | Recommendation                                                                                                                                                                       | Reported on page # |
|------------------------------|--------|--------------------------------------------------------------------------------------------------------------------------------------------------------------------------------------|--------------------|
| <b>Title and abstract</b>    | 1      | (a) Indicate the study's design with a commonly used term in the title or the abstract                                                                                               | 1-2                |
|                              |        | (b) Provide in the abstract an informative and balanced summary of what was done and what was found                                                                                  |                    |
| <b>Introduction</b>          |        |                                                                                                                                                                                      |                    |
| Background/rationale         | 2      | Explain the scientific background and rationale for the investigation being reported                                                                                                 | 2-4                |
| Objectives                   | 3      | State specific objectives, including any prespecified hypotheses                                                                                                                     |                    |
| <b>Methods</b>               |        |                                                                                                                                                                                      |                    |
| Study design                 | 4      | Present key elements of study design early in the paper                                                                                                                              | 4                  |
| Setting                      | 5      | Describe the setting, locations, and relevant dates, including periods of recruitment, exposure, follow-up, and data collection                                                      | 5                  |
| Participants                 | 6      | (a) Give the eligibility criteria, and the sources and methods of selection of participants                                                                                          | 8-9                |
| Variables                    | 7      | Clearly define all outcomes, exposures, predictors, potential confounders, and effect modifiers. Give diagnostic criteria, if applicable                                             | 8-9                |
| Data sources/<br>measurement | 8*     | For each variable of interest, give sources of data and details of methods of assessment (measurement). Describe comparability of assessment methods if there is more than one group | 9-10               |
| Bias                         | 9      | Describe any efforts to address potential sources of bias                                                                                                                            |                    |
| Study size                   | 10     | Explain how the study size was arrived at                                                                                                                                            | 8-9                |
| Quantitative variables       | 11     | Explain how quantitative variables were handled in the analyses. If applicable, describe which groupings were chosen and why                                                         | 9                  |
| Statistical methods          | 12     | (a) Describe all statistical methods, including those used to control for confounding                                                                                                | 11-13              |
|                              |        | (b) Describe any methods used to examine subgroups and interactions                                                                                                                  |                    |
|                              |        | © Explain how missing data were addressed                                                                                                                                            |                    |
|                              |        | (d) If applicable, describe analytical methods taking account of sampling strategy                                                                                                   |                    |
|                              |        | (e) Describe any sensitivity analyses                                                                                                                                                |                    |
| <b>Results</b>               |        |                                                                                                                                                                                      |                    |

|                          |     |                                                                                                                                                                                                                                                                                                                                                                                                               |     |
|--------------------------|-----|---------------------------------------------------------------------------------------------------------------------------------------------------------------------------------------------------------------------------------------------------------------------------------------------------------------------------------------------------------------------------------------------------------------|-----|
| Participants             | 13* | (a) Report numbers of individuals at each stage of study—eg numbers potentially eligible, examined for eligibility, confirmed eligible, included in the study, completing follow-up, and analysed<br>(b) Give reasons for non-participation at each stage<br>(c) Consider use of a flow diagram                                                                                                               | 8-9 |
| Descriptive data         | 14* | (a) Give characteristics of study participants (eg demographic, clinical, social) and information on exposures and potential confounders<br>(b) Indicate number of participants with missing data for each variable of interest                                                                                                                                                                               |     |
| Outcome data             | 15* | Report numbers of outcome events or summary measures                                                                                                                                                                                                                                                                                                                                                          |     |
| Main results             | 16  | (a) Give unadjusted estimates and, if applicable, confounder-adjusted estimates and their precision (eg, 95% confidence interval). Make clear which confounders were adjusted for and why they were included<br>(b) Report category boundaries when continuous variables were categorized<br>(c) If relevant, consider translating estimates of relative risk into absolute risk for a meaningful time period |     |
| Other analyses           | 17  | Report other analyses done—eg analyses of subgroups and interactions, and sensitivity analyses                                                                                                                                                                                                                                                                                                                |     |
| <b>Discussion</b>        |     |                                                                                                                                                                                                                                                                                                                                                                                                               |     |
| Key results              | 18  | Summarise key results with reference to study objectives                                                                                                                                                                                                                                                                                                                                                      |     |
| Limitations              | 19  | Discuss limitations of the study, taking into account sources of potential bias or imprecision. Discuss both direction and magnitude of any potential bias                                                                                                                                                                                                                                                    |     |
| Interpretation           | 20  | Give a cautious overall interpretation of results considering objectives, limitations, multiplicity of analyses, results from similar studies, and other relevant evidence                                                                                                                                                                                                                                    |     |
| Generalisability         | 21  | Discuss the generalisability (external validity) of the study results                                                                                                                                                                                                                                                                                                                                         |     |
| <b>Other information</b> |     |                                                                                                                                                                                                                                                                                                                                                                                                               |     |
| Funding                  | 22  | Give the source of funding and the role of the funders for the present study and, if applicable, for the original study on which the present article is based                                                                                                                                                                                                                                                 | 14  |

\*Give information separately for cases and controls in case-control studies and, if applicable, for exposed and unexposed groups in cohort and cross-sectional studies.

**Note:** An Explanation and Elaboration article discusses each checklist item and gives methodological background and published examples of transparent reporting. The STROBE checklist is best used in conjunction with this article (freely available on the Web sites of PLoS Medicine at <http://www.plosmedicine.org/>, Annals of Internal Medicine at <http://www.annals.org/>, and Epidemiology at <http://www.epidem.com/>). Information on the STROBE Initiative is available at [www.strobe-statement.org](http://www.strobe-statement.org).
